# Supplementary material for: Stable yet dynamic: a cross-era comparative case study of drought impacts and social responses in Germany and Jing-Jin-Ji Region (China)
Source: Copernicus journal article supplement (doi:10.5194/cp-21-1481-2025), 2025-08-29
Supplement: Supplementary file 1 [file cp-21-1481-2025-supplement.zip]

## Sheet: Supplement S4
Study area	Event	Response	Dimension	Type	Scale	Actor	Target
Germany	1834 drought event	Local fire brigades and relief teams took actions to extinguish fires	Governance/Management	Behavioral	Local	Institution/Organization	Ecological (vegetation: wildfire); Socioeconomic (economy: fire-induced private property losses)
Germany	1834 drought event	Community insisted on storing water in cisterns for worse water shortage situation or possible fire disaster in the near future	Governance/Management	Behavioral	Local	Civil society	Socioeconomic (water security; economy: fire-induced private property losses)
Germany	1834 drought event	Ranchers carried out emergency slaughter	Consumption	Behavioral	Local	Individual/Household	Agricultural (livestock: lack of fodder)
Germany	1834 drought event	Ranchers drove their cattle into poorly growing clover fields for food	Consumption	Behavioral	Local	Individual/Household	Agricultural (livestock: lack of fodder)
Germany	1834 drought event	The Royal Ministry of Finance in Stuttgart (i.e., the capital of the Kingdom of Württemberg) relaxed restrictions on obtaining fodder from kindom owned forest	Consumption	Behavioral	Local	Government	Agricultural (livestock: lack of fodder)
Germany	1834 drought event	The Royal Ministry of Finance in Stuttgart (i.e., the capital of the Kingdom of Württemberg) allowed livestock to graze in kindom owned forest	Consumption	Behavioral	Local	Government	Agricultural (livestock: lack of fodder)
Germany	1834 drought event	Community organized cross-regional water transport (i.e., carrying water from water-rich valleys by wagons)	Consumption	Behavioral	Subnational	Civil society	Socioeconomic (water security)
Germany	1834 drought event	The administration of the Lake Constance implemented industrial water rationing for factories (e.g., sawmills)	Consumption	Behavioral	Local	Government	Socioeconomic (water security)
Germany	1834 drought event	Farmers replanted turnip and vicia-oats to compensate for losses in summer cereal harvests	Production	Behavioral	Local	Individual/Household	Agricultural (crop: harvest failure)
Germany	1834 drought event	Community covered well troughs to prevent them from cracking	Production	Behavioral	Local	Civil society	Socioeconomic (water security)
Germany	1921 drought event	The Interior Ministry of Baden invited representatives of local consumer organizations to discuss the coming difficult food situation	Governance/Management	Behavioral	Local	Government, Institution/Organization	Socioeconomic (food security)
Germany	1921 drought event	The public prosecutor's office of Constance took strict action against the speculative purchases by potato acquirers	Governance/Management	Behavioral	Local	Government	Socioeconomic (food security: high price; social stability: speculative purchase)
Germany	1921 drought event	Community stored water in cisterns for worse water shortage situation in the near future	Governance/Management	Behavioral	Local	Civil society	Socioeconomic (water security)
Germany	1921 drought event	Local fire brigade extinguished fires in the town with the help of fire brigades from surrounding towns	Governance/Management	Behavioral	Subnational, Local	Institution/Organization	Socioeconomic (economy: fire-induced private property losses)
Germany	1921 drought event	Children's hospital adjusted opening hours (i.e., 9 am to 10 am and after 4 pm) to avoid the exposure of sick children (esp. infants) to the hottest hours of a day	Governance/Management	Behavioral	Local	Private sector	Socioeconomic (health: heatstroke)
Germany	1921 drought event	Berliner Tageblatt (a national daily newspaper from 1872 to 1939) criticized the poor living conditions of the poor in density populated neighborhoods and urged more attention to vulnerable groups (esp. infants) during heatwaves	Governance/Management	Behavioral	National	Private sector	Socioeconomic (health: increasing infant mortality)
Germany	1921 drought event	Berliner Tageblatt (a national daily newspaper from 1872 to 1939) gave specific advice on taking care of infants during heatwaves	Governance/Management	Technological	National	Private sector	Socioeconomic (health: increasing infant mortality)
Germany	1921 drought event	The Interior Ministry of Baden, the Finance Ministry of Baden, and local agricultural organizations decided to allowed ranchers to obtain fodder and straw from the state owned forest	Consumption	Behavioral	Local	Government, Institution/Organization	Agricultural (livestock: lack of fodder, lack of bedding material)
Germany	1921 drought event	The Interior Ministry of Baden, the Finance Ministry of Baden, and local agricultural organizations negotiated on emergency tariffs	Consumption	Behavioral	Local	Government, Institution/Organization	Agricultural (livestock: lack of fodder, lack of bedding material)
Germany	1921 drought event	The Interior Ministry of Baden issued restrictions on exporting fodder and straw (e.g., a stamped consignment note or transportation document must be presented when shipping hay and straw from Baden)	Consumption	Behavioral	Local	Government	Agricultural (livestock: lack of fodder, lack of bedding material)
Germany	1921 drought event	The Interior Ministry of Baden, the Finance Ministry of Baden, and local agricultural organizations procured peat litter and use it as a substitute for straw	Consumption	Behavioral	Local	Government, Institution/Organization	Agricultural (livestock: lack of bedding material)
Germany	1921 drought event	The Reich Ministry of Food and Agriculture advocated for the complete lifting of the import prohibition on bread grains	Consumption	Behavioral	National	Government	Socioeconomic (food security: high price)
Germany	1921 drought event	The Karlsruhe local committee of the General German Trade Union Confederation requested the the Interior Ministry of Baden to hold a meeting between employees and employers on difficult food situation	Consumption	Behavioral	Local	Institution/Organization	Socioeconomic (food security: high price)
Germany	1921 drought event	The Interior Ministry of Baden decided to compensate high food prices by increasing remuneration	Consumption	Behavioral	Local	Government	Socioeconomic (food security: high price)
Germany	1921 drought event	Community organized cross-regional water transport	Consumption	Behavioral	Subnational	Civil society	Socioeconomic (water security)
Germany	1921 drought event	Community implemented domestic water rationing and allocated water according to family size	Consumption	Behavioral	Local	Civil society	Socioeconomic (water security)
Germany	1921 drought event	Community issued restriction on water usage (e.g., water should only be used for drink, workers at local cigar factory were not allowed to wash their hands and feet at the community well)	Consumption	Behavioral	Local	Civil society	Socioeconomic (water security)
Germany	1921 drought event	Local government issued restrictions on municipal, industrial, and domestic use of electricity	Consumption	Behavioral	Local	Government	Socioeconomic (energy: electricity)
Germany	1921 drought event	Waterworks were expanded	Production	Infrastructural	Local	Private sector	Socioeconomic (water security)
Germany	1921 drought event	Households dug their private wells deeper	Production	Infrastructural	Local	Individual/Household	Socioeconomic (water security)
Germany	2018 drought event	German Weather Service, i.e., Deutscher Wetterdienst (DWD), forecasted and issued warnings for severe weather	Governance/Management	Technological	National	Institution/Organization	Meteorological
Germany	2018 drought event	State government provided fundings for climate change adaptation in rural areas	Governance/Management	Infrastructural	Local	Government	Meteorological
Germany	2018 drought event	The city administration and an anonymous person in Darmstadt urged citizens to water trees voluntarily	Governance/Management	Behavioral	Local	Government, Individual/Household	Ecological (vegetation: poor plant growth)
Germany	2018 drought event	Hessen Forestry Agency planned to improve forest structural diversification	Governance/Management	Technological	Local	Institution/Organization	Ecological (vegetation)
Germany	2018 drought event	Scientists tested in several cities in northern Germany to find climate-resilient tree species for urban greening	Governance/Management	Technological	Local	Institution/Organization	Ecological (vegetation)
Germany	2018 drought event	Police, fire brigade and/or garden department of cities increased watering plants in downtown to prevent them from withering	Governance/Management	Behavioral	Local	Institution/Organization	Ecological (vegetation: poor plant growth)
Germany	2018 drought event	Many state governments and city administrations restricted or even prohibited the use of fires (e.g., barbecue) in or near forests	Governance/Management	Behavioral	Local	Government	Ecological (vegetation: wildfire)
Germany	2018 drought event	Local government cancelled activities with a risk of wildfire, such as firework shows	Governance/Management	Behavioral	Local	Government	Ecological (vegetation: wildfire)
Germany	2018 drought event	Local volunteer, fire brigades from the local area and other regions over the country, the federal police, and even the armed forces of Germany actively participated in extinguishing wildfires	Governance/Management	Behavioral	National, Subnational, Local	Government, Institution/Organization, Individual/Household	Ecological (vegetation: wildfire)
Germany	2018 drought event	Local farmers and fire brigades urged the public to avoid throwing cigarette butts or glass bottles and burning things carelessly outdoors	Governance/Management	Behavioral	Local	Institution/Organization	Ecological (vegetation: wildfire)
Germany	2018 drought event	Local farmers, fire brigade, and government updated firefighting equipment and infrastructure	Governance/Management	Infrastructural	Local	Government, Institution/Organization	Ecological (vegetation: wildfire)
Germany	2018 drought event	State fire brigade association, forestry department, and government monitored suspected wildfires with aircrafts and camera-based surveillance system	Governance/Management	Technological	Local	Government, Institution/Organization	Ecological (vegetation: wildfire)
Germany	2018 drought event	Local fire brigade, city administration, and citizens helped evacuate and resettle residents threatened by wildfires	Governance/Management	Behavioral	Local	Government, Institution/Organization, Individual/Household	Ecological (vegetation: wildfire)
Germany	2018 drought event	State government undertook a long-term ecological program to plant more deciduous trees in forests, which are less likely to burn than conifers	Governance/Management	Institutional	Local	Government	Ecological (vegetation: wildfire)
Germany	2018 drought event	City administrations asked their citizens to quickly report any signs of problems in rivers and lakes	Governance/Management	Behavioral	Local	Government	Ecological (freshwater system)
Germany	2018 drought event	Local authorities oversaw the discharge of cooling water by power plants to protect rivers from overheating	Governance/Management	Behavioral	Local	Government	Ecological (freshwater system: increased water temperature)
Germany	2018 drought event	The State Agency for Nature Conservation, Environment and Geology monitored the development of algea bloom	Governance/Management	Technological	Local	Institution/Organization	Ecological (freshwater system: deteriorated water quality)
Germany	2018 drought event	Local fire brigade attempted to stop algae blooms and fish deaths by oxygenating water bodies	Governance/Management	Behavioral	Local	Institution/Organization	Ecological (freshwater system: deteriorated water quality, fish death)
Germany	2018 drought event	Helmholtz Center for Environmental Research monitored the development of soil moisture insufficiency in the whole country	Governance/Management	Technological	National	Institution/Organization	Agricultural (soil moisture)
Germany	2018 drought event	The federal government had established long-term climate adaptation strategy and offered cooperations in shifting to climate-resilient crops and cultivation methods	Governance/Management	Institutional	National	Government	Agricultural (crop)
Germany	2018 drought event	The federal and state governments assessed harvest losses due to heat and drought and the extent of their impacts on farmers	Governance/Management	Behavioral	National, Local	Government	Socioeconomic (economy: decrease in income); Agricultural (crop)
Germany	2018 drought event	Ad-hoc-AG "Extremsituation" (cross-state working group of Brandenburg, Saxony and Berlin) promoted purposeful management and economical use of water in reservoirs	Governance/Management	Behavioral	Subnational	Government	Hydrological (lake & reservoir: shrinking water body )
Germany	2018 drought event	Bavarian Environment Ministry expanded low-water-level information service and developed low-water-level management plans for quick reaction in future droughts	Governance/Management	Institutional	Local	Government	Hydrological
Germany	2018 drought event	The Federal Environment Agency (UBA) made a list of preventive or coping measures that could be adopted by different sectors in the face of low water level	Governance/Management	Institutional	National	Institution/Organization	Hydrological
Germany	2018 drought event	Ferry operator carried out massive dredging to keep rivers navigable	Governance/Management	Behavioral	Local	Private sector	Socioeconomic (economy: obstruction of water-borne transport); Hydrological
Germany	2018 drought event	The Federal Waterways and Shipping Administration and the Weser Waterways and Shipping Officeto released water from reservoirs keep rivers navigable	Governance/Management	Behavioral	National, Local	Government	Socioeconomic (economy: obstruction of water-borne transport); Hydrological
Germany	2018 drought event	State governments of Berlin, Brandenburg and Saxony scheduled regular meeting to consult on preventing the capital from water scarcity	Governance/Management	Behavioral	Subnational	Government	Socioeconomic (water security)
Germany	2018 drought event	The Federal Office for Civil Protection and Disaster Relief (BBK) and the state government of Berlin worked on developing their future action plans to mitigate the risk of water supply-demand imbalance, separately	Governance/Management	Institutional	National, Local	Government	Socioeconomic (water security)
Germany	2018 drought event	The state government of Hesse invested in studies on improving local water securit	Governance/Management	Technological	Local	Government	Socioeconomic (water security)
Germany	2018 drought event	Farming company prohibited smoking near stables	Governance/Management	Behavioral	Local	Private sector	Socioeconomic (economy: fire-induced private property losses)
Germany	2018 drought event	European Union simplify procedures for providing financial aids to drought-affected farmers, which allowed any EU government to provide emergency aid to farmers in need without registering with the EU Commission	Governance/Management	Behavioral	International	Institution/Organization	Socioeconomic (economy: decrease in income)
Germany	2018 drought event	City administrations developed plans to make cities more resilience to climate change (esp. more intense and frequent heatwaves), includig but not limited to building water features for creating pleasant urban climate, increasing urban greenery, and changing building colours from dark to light	Governance/Management	Institutional	Local	Government	Meteorological (heatwaves)
Germany	2018 drought event	The German Red Cross (DRK), the Federal Office for Radiation Protection (BfS), and local newspapers (e.g., Frankfurter Neue Presse) gave health advice on dealting with hot weathers and increasing UV radiation	Governance/Management	Technological	National, Local	Institution/Organization, Private sector	Socioeconomic (health)
Germany	2018 drought event	Hospitals, kindergartens, nursing homes and retirement homes protected the vulerable groups from heat by special precautions (e.g., make sure drink enough water, avoid outside activities, keep windows and shutters closed, provide cold towels, wear light clothes)	Governance/Management	Behavioral	Local	Private sector	Socioeconomic (health)
Germany	2018 drought event	Dress code on some special occasions was relaxed to avoid heatstroke (e.g., Interior State Secretary in Schleswig-Holstein allowed police officers to carry out duties without wearing hats, Cemetery administration in Erfurt allowed mourners to relax dress code)	Governance/Management	Behavioral	Local	Government	Socioeconomic (health)
Germany	2018 drought event	Cemetery administration in Erfurt provided elderly mourners with extra water and electric vehicles running from the entrance to the grave sites	Governance/Management	Behavioral	Local	Government	Socioeconomic (health)
Germany	2018 drought event	State governments and the Allgemeiner Deutscher Automobil-Club (ADAC) gave advices on safe driving or preventing travel delays when exposed to the risk of heat-damaged highways	Governance/Management	Technological	Local	Government, Institution/Organization	Socioeconomic (economy: infrastructure damage)
Germany	2018 drought event	The state road construction authority started repairing heat-damaged highways as soon as possible	Governance/Management	Infrastructural	Local	Government	Socioeconomic (economy: infrastructure damage)
Germany	2018 drought event	The Stuttgart regional council announced speed limits on highways in case of sudden heat-induced damage (i.e., highway blow-up)	Governance/Management	Behavioral	Local	Government	Socioeconomic (economy: infrastructure damage)
Germany	2018 drought event	Fire brigade cooled the airport runways with thousands of liters of water, as an emergency measure to avoid runways being damaged again	Governance/Management	Behavioral	Local	Institution/Organization	Socioeconomic (economy: infrastructure damage)
Germany	2018 drought event	State road construction authority of Saxony-Anhalt and the Deutsche Bahn increased checking highways and railways for possible heat damage	Governance/Management	Behavioral	Local	Government, Private sector	Socioeconomic (economy: infrastructure damage)
Germany	2018 drought event	Ranchers carried out emergency slaughter	Consumption	Behavioral	Local	Individual/Household	Agricultural (livestock: lack of fodder)
Germany	2018 drought event	Ranchers bought extra fodder from neighboring farms and even other regions	Consumption	Behavioral	Subnational, Local	Individual/Household	Agricultural (livestock: lack of fodder)
Germany	2018 drought event	Ranchers held their livestock in captivity as early as summer and fed them with winter fodder	Consumption	Behavioral	Local	Individual/Household	Agricultural (livestock: lack of fodder)
Germany	2018 drought event	Ranchers increased the planting area and variety of fodder crops, especially beans and maize that were more tolerant to extreme weather	Consumption	Behavioral	Local	Individual/Household	Agricultural (livestock: lack of fodder)
Germany	2018 drought event	Ranchers cut down drought-affected crops (e.g., winter barley) before they matured and made them into fodder	Consumption	Behavioral	Local	Individual/Household	Agricultural (livestock: lack of fodder)
Germany	2018 drought event	Ranchers used straw as a substitute for fodder	Consumption	Behavioral	Local	Individual/Household	Agricultural (livestock: lack of fodder)
Germany	2018 drought event	The federal and state goverments provided financial aids to drought-affected ranchers for purchasing fodder	Consumption	Behavioral	National, Local	Government	Agricultural (livestock: lack of fodder)
Germany	2018 drought event	Ranchers and local embankment association applied for allowing grazing on or obtaing hay from the berms	Consumption	Behavioral	Local	Institution/Organization, Individual/Household	Agricultural (livestock: lack of fodder)
Germany	2018 drought event	North Rhine-Westphalia government allowed organic ranches to feed their livestock with conventional fodder that is not grown under the strict organic rules upon request	Consumption	Behavioral	Local	Government	Agricultural (livestock: lack of fodder)
Germany	2018 drought event	European Union and the German federal and state governemnts all decided to relax the restrictions on land use in drought-affected areas, which allowed fallow land to be temporarily used as potential sources of fodder	Consumption	Behavioral	International, National, Local	Government, Institution/Organization	Agricultural (livestock: lack of fodder)
Germany	2018 drought event	Ad-hoc-AG "Extremsituation" (cross-state working group of Brandenburg, Saxony and Berlin) and planty of city administrations issued restrictions and even prohibitions on taking water from open water	Consumption	Behavioral	Subnational, Local	Government	Hydrological
Germany	2018 drought event	The Berlin administration closed all weirs and restrict lock operations in the city area to maintain water level of rivers	Consumption	Behavioral	Local	Government	Hydrological (river: low water level)
Germany	2018 drought event	The Berlin administration used treated wastewater as water supply to maintain reservoir level	Consumption	Behavioral	Local	Government	Hydrological (lake & reservoir: shrinking water body )
Germany	2018 drought event	The Berlin administration temporarily change the distribution of water discharge from the Mecklenburg Upper Lakes to support the Upper Havel river	Consumption	Behavioral	Subnational	Government	Hydrological
Germany	2018 drought event	Germany imported wheats from France and Eastern Europe, where harvests were better, to partialy compensate for its own losses as well as control bread prices	Consumption	Behavioral	International	Government	Socioeconomic (food security)
Germany	2018 drought event	Local governments and water supply companies connected new water sources to the supply systems to ensure sufficient drinking water supply (e.g., connecting a reservoir nearby to the supply system that usually relied on groundwater)	Consumption	Behavioral	Local	Government, Private sector	Socioeconomic (water security)
Germany	2018 drought event	Local governments, German Association of Local Public Utilities (VKU), and some transport companies participated in cross-regional water transport (e.g., carrying water from less affected areas by water tankers and milk lorries, transporting water from Lake Constance to areas up to the Hesse state border)	Consumption	Behavioral	Subnational	Government, Institution/Organization, Private sector	Socioeconomic (water security)
Germany	2018 drought event	Residents of areas with difficulties in domestic water supply sought alternative drinking water supply on their own (e.g., buying drinkg water in local supermarkets, taking water from the residences of their family members and friends or from public buildings)	Consumption	Behavioral	Local	individual/Household	Socioeconomic (water security)
Germany	2018 drought event	City administrations and local water associations issued restrictions on water usage to ease drinking water emergency, which prohibited watering gardens and fields, filling swimming pools, and washing cars	Consumption	Behavioral	Local	Government, Institution/Organization	Socioeconomic (water security)
Germany	2018 drought event	Local governments organized fire bridges to provide emergency water supply for drinking and hygiene	Consumption	Behavioral	Local	Government, Institution/Organization	Socioeconomic (water security)
Germany	2018 drought event	Local government built temporary pipelines to ensure water supply	Consumption	Infrastructural	Local	Government	Socioeconomic (water security)
Germany	2018 drought event	Local government released water storage in reservoirs	Consumption	Behavioral	Local	Government	Socioeconomic (water security)
Germany	2018 drought event	City administration took action to reduce public water consumption, such as temporarily switched off fountains and stopped watering green spaces	Consumption	Behavioral	Local	Government	Socioeconomic (water security)
Germany	2018 drought event	Ad-hoc-AG "Extremsituation" (cross-state working group of Brandenburg, Saxony and Berlin), water associations, and several state or city administrations promoted water conservation to the public	Consumption	Behavioral	Subnational, Local	Government, Institution/Organization	Socioeconomic (water security)
Germany	2018 drought event	Bavarian Environment Ministry and Agriculture Ministry invested in improving infrastructure for drinking water supply	Consumption	Infrastructural	Local	Government	Socioeconomic (water security)
Germany	2018 drought event	City administration implemented "Trinkwasserampel (drinking water traffic light)" programme, which could indicate the situation of local water supply-demand balance and guide the proper use of water	Consumption	Technological	Local	Government	Socioeconomic (water security)
Germany	2018 drought event	The federal government released some of the strategic fuel reserves and allowed to use them in regions where fuel supply was affected by the obstruction of water-borne transport due to low water level	Consumption	Behavioral	National	Government	Socioeconomic (energy: fuel)
Germany	2018 drought event	German Forestry Council (DFWR), German Farmers' Association, and the Federal Association of the Fruit, Vegetable and Potato Processing Industry (BOGK) urged the government to provide financial aids to those who suffered great losses due to drought (e.g., farmers, forestry practitioner, etc.)	Consumption	Behavioral	National	Institution/Organization	Socioeconomic (economy: decrease in income)
Germany	2018 drought event	German Farmers' Association negotiated with the federal government on financial aids for drought-affected farmers	Consumption	Behavioral	National	Government, Institution/Organization	Socioeconomic (economy: decrease in income)
Germany	2018 drought event	The working group for rural agriculture (AbL) negotiated with the food industry on increasing prices of agricultural production to cover farmers' losses due to drought	Consumption	Behavioral	National	Institution/Organization	Socioeconomic (economy: decrease in income)
Germany	2018 drought event	The federal government and the state goverments provided 340 million euros aid for drought-induced losses to farmers whose harvests reduce over 30%	Consumption	Behavioral	National, Local	Government	Socioeconomic (economy: decrease in income)
Germany	2018 drought event	Horse farm owner passed on additional costs to consumers (i.e., owners of boarded horses)	Consumption	Behavioral	Local	Individual/Household	Socioeconomic (economy: increase in expenditure)
Germany	2018 drought event	Shipping companies take alternative route (e.g., shipping freight from Berlin and Magdeburg via the Mittelland and Elbe Lateral Canals as an alternative)	Consumption	Behavioral	Local	Private sector	Socioeconomic (economy: obstruction of water-borne transport)
Germany	2018 drought event	The chemical company (i.e., BASF) and some cruise line companies replaced water-borne transport with other means of transport (e.g., cruise line company used bus to bridge shallow water areas)	Consumption	Behavioral	Local	Private sector	Socioeconomic (economy: obstruction of water-borne transport)
Germany	2018 drought event	Individuals changed their consumption options and lifestyle, in terms of diet (e.g., ice cream, Poke Bowl), clothing (e.g., more men in shorts), and consumption options for entertainment (e.g., spending more time and money on garden furniture and swimming pools), to better adapt to hot weathers	Consumption	Behavioral	Local	Individual/Household	Meteorological (heatwaves)
Germany	2018 drought event	Households and small shops increasingly bought fans or air conditioners to fight the heat	Consumption	Behavioral	Local	Private sector, Individual/Household	Meteorological (heatwaves)
Germany	2018 drought event	Supermarket provided customers with paid access to its cold storage facility	Consumption	Behavioral	Local	Private sector	Meteorological (heatwaves)
Germany	2018 drought event	Federal Ministry of Food and Agriculture asked state governments to use their discretion in plant protection products and control methods, in order to reduce risks to crops and wood production	Production	Behavioral	National	Government	Ecological (vegetation: insect plague)
Germany	2018 drought event	Munich Forestry Company patrolled through forests, identified infected trees, and cut down and removed them as soon as possible, in order to reduce risks to wood production	Production	Behavioral	Local	Private sector	Ecological (vegetation: insect plague)
Germany	2018 drought event	The Hessian Fishermen's Association (VHF) appealed to water authorities to conduct surprise inspections of hydroelectric power plants, which were believed to be exacerbating fish deaths in the pursuit of profits	Production	Behavioral	Local	Institution/Organization	Ecological (freshwater system: fish death)
Germany	2018 drought event	Farmers changed their farming practices to reduce water evaporation and better keep soil moisture (e.g., shallow tillage, humus farming)	Production	Technological	Local	Individual/Household	Agricultural (soil moisture)
Germany	2018 drought event	Farmers irrigated their fields	Production	Behavioral	Local	Individual/Household	Agricultural (soil moisture)
Germany	2018 drought event	Bavaria's Environment Ministry and Agriculture Ministry invested in developing agricultural water conservancy facilities (e.g., water-saving irrigation, water storage)	Production	Infrastructural	Local	Government	Agricultural (soil moistures)
Germany	2018 drought event	Bavaria state and private institutes worked on breeding climate-resilient, high-yielding crops	Production	Technological	Local	Government, Institution/Organization	Agricultural (crop)
Germany	2018 drought event	Farmers increasingly planted drought-resistant crops (e.g., oat, millet, lentils, melon)	Production	Technological	Local	Individual/Household	Agricultural (crop)
Germany	2018 drought event	Farmers postponed the harvest date of vegetables so that they could grow large enough	Production	Behavioral	Local	Individual/Household	Agricultural (crop)
Germany	2018 drought event	Local government, water association, and specialised company participated in seeking new water sources by drilling new wells or exploiting new groundwater deposits	Production	Behavioral	Local	Government, Institution/Organization, Private sector	Socioeconomic (water security)
Germany	2018 drought event	Hydropower plants factories negotiated with local water authorities on water usage limits for electricity generation	Production	Behavioral	Local	Government, Private sector	Socioeconomic (energy: electricity)
Germany	2018 drought event	The Baden-Württemberg Ministry of Environment relaxed the temperature restriction on cooling water discharged from power plants, in order to ensure adequate electricity generation for the state	Production	Behavioral	Local	Government	Socioeconomic (energy: electricity)
Germany	2018 drought event	Winemakers preserved most of the leaves on the vine on purpose to protect the grapes from sunburn	Production	Behavioral	Local	Individual/Household	Agricultural (crop)
Germany	2018 drought event	Ranchers cooled their livestock with showers	Production	Behavioral	Local	Individual/Household	Agricultural (livestock)
Germany	2018 drought event	Employers (incl. local goverments and companies) adjusted working hours according to temperature (e.g., adopting siesta, reducing overtime work, considering shor-time work or vacation), in order to address heat-induced low labour capacity	Production	Behavioral	Local	Government, Private sector	Socioeconomic (health)
Jing-Jin-Ji (China)	1832 drought event	Central and local governments carried out surveys to assess the severity of locust plague	Governance/Management	Behavioral	National, Local	Government	Ecological (vegetation: insect plague)
Jing-Jin-Ji (China)	1832 drought event	Local governments set up agencies to buying locust larva, in order to encourage local residents to participated in controlling locust plague	Governance/Management	Behavioral	Local	Government	Ecological (vegetation: insect plague)
Jing-Jin-Ji (China)	1832 drought event	Central and local governments carried out surveys on general drought damages, grain reserves, and government finances in preparation for food relief	Governance/Management	Behavioral	National, Local	Government	Socioeconomic (food security)
Jing-Jin-Ji (China)	1832 drought event	Local goverments strengthened patrols (esp. in the capital), stopped minor officials from harasing the displaced, and punished crimes such as hoarding grains for profiteering, obtaining relief by deception, and organizing looting and extortion under the pretext of famine	Governance/Management	Behavioral	Local	Government	Socioeconomic (food security: high food price; social stability: crimes)
Jing-Jin-Ji (China)	1832 drought event	Central and local governments provided temporary migrants in Beijing with special funds and organized them to return hometown after the drought ended	Governance/Management	Behavioral	National, Local	Government	Socioeconomic (social stability: displacement and migration)
Jing-Jin-Ji (China)	1832 drought event	The starving people ate leaves, tree bark, chaff, etc. as substitutes for normal food	Consumption	Behavioral	Local	Individual/Household	Socioeconomic (food security)
Jing-Jin-Ji (China)	1832 drought event	The emperor (as the supreme ruler of the country, his actions represent the central government) requested governments of less affected neighbouring provinces and governments of provinces along the Jing-Hang Grant Canal to assist both government owned ships and private grain merchants in transporting grains to drought-stricken areas	Consumption	Behavioral	National, Subnational	Government, Private sector	Socioeconomic (food security)
Jing-Jin-Ji (China)	1832 drought event	Central government exempted grain tax for ships transporting grains from less affected neighbouring provinces to drought-stricken areas	Consumption	Behavioral	National	Government	Socioeconomic (food security)
Jing-Jin-Ji (China)	1832 drought event	Local governments encouraged donations (e.g., surplus grains, money) from rich local residents for food relief	Consumption	Behavioral	Local	Government	Socioeconomic (food security)
Jing-Jin-Ji (China)	1832 drought event	Some generous and wealthy families provided grains or money for the relief of other starving local residents	Consumption	Behavioral	Local	Individual/Household	Socioeconomic (food security)
Jing-Jin-Ji (China)	1832 drought event	Local grain reserves in ever-normal granaries (常平仓, the official granary management system that stores grains in counties, towns, and cities) were released to the market under the guidance and financial support of the central government, in order to curb grain prices	Consumption	Behavioral	National, Local	Government	Socioeconomic (food security: high food price)
Jing-Jin-Ji (China)	1832 drought event	Local and central governments established soup kitchens in towns and cities within drought-affected areas and provided starving people with porridge relief	Consumption	Behavioral	National, Local	Government	Socioeconomic (food security)
Jing-Jin-Ji (China)	1832 drought event	The starving people left their hometowns and attempted to obtain food in cities or less affected areas	Consumption	Behavioral	Subnational, Local	Individual/Household	Socioeconomic (food security)
Jing-Jin-Ji (China)	1832 drought event	Local governments distributed (lent or sent) grains to severely affected people (e.g., destitute families)	Consumption	Behavioral	Local	Government	Socioeconomic (food security)
Jing-Jin-Ji (China)	1832 drought event	Local governments organized work relief (i.e., providing affected people with work opportunities to earn money by constructing government-invested facilities, such as hydraulic engineering in drought-affected areas) with financial support from central government	Consumption	Behavioral	National, Local	Government	Socioeconomic (food security)
Jing-Jin-Ji (China)	1832 drought event	The emperor (as the supreme ruler of the country, his actions represent the central government) issued restrictions on the purchase of grains released from reserves per person per day and prohibited local grain merchants from buying those cheap grains for profiteering	Consumption	Behavioral	National	Government	Socioeconomic (food security: high food price; social stability: crimes)
Jing-Jin-Ji (China)	1832 drought event	The emperor (as the supreme ruler of the country, his actions represent the central government) decided to exempt, reduce or defer taxes for affected farmers depending on the severity of local harvest failures	Consumption	Behavioral	National	Government	Socioeconomic (economy)
Jing-Jin-Ji (China)	1832 drought event	The emperor (as the supreme ruler of the country, his actions represent the central government) cancelled his annual spring visit to the royal mausoleum, in order to avoid placing extra burdens on the affected areas	Consumption	Behavioral	National	Government	Socioeconomic (economy)
Jing-Jin-Ji (China)	1832 drought event	The emperor (as the supreme ruler of the country, his actions represent the central government) and royal family members prayed for rain	Production	Behavioral	National	Government	Meteorological (precipitation deficits)
Jing-Jin-Ji (China)	1832 drought event	The emperor (as the supreme ruler of the country, his actions represent the central government) asked for frank admonition on his governance, because inappropriate governance practices were seen as a cause of warnings from the heavens through abnormal phenomena	Production	Behavioral	National	Government	Meteorological (precipitation deficits)
Jing-Jin-Ji (China)	1832 drought event	The emperor (as the supreme ruler of the country, his actions represent the central government) requested and both central and local governments participated in speeding up case trials, vindicating unjust cases, and mitigating punishments for extenuating circumstances, because the government's lack of benevolence was considered as a cause of warnings from the heavens through abnormal phenomena	Production	Behavioral	National, Local	Government	Meteorological (precipitation deficits)
Jing-Jin-Ji (China)	1832 drought event	Farmers replanted short-season crops	Production	Behavioral	Local	Individual/Household	Agricultural (crop)
Jing-Jin-Ji (China)	1832 drought event	Local governments lent seeds, farming tools, and money to drought-affected farmers who had difficulties in carrying out agricultural activities	Production	Behavioral	Local	Government	Agricultural (crop: harvest failure)
Jing-Jin-Ji (China)	1920 drought event	Famous personalities, native and international relief committees, and the Chinese governments established the China International Famine Relief Commission after this drought, which operated in the following two decades and promoted the Rural Cooperative Movement and infrastructue development to prevent famine in advance	Governance/Management	Institutional, Behavioral	International, National, Local	Government, Institution/Organization, Individual/Household	Socioeconomic (food security)
Jing-Jin-Ji (China)	1920 drought event	The railway department arranged special trains to send temporary migrants back to their hometown after the drought ended	Governance/Management	Behavioral	National	Government	Socioeconomic (social stability: displacement and migration)
Jing-Jin-Ji (China)	1920 drought event	Peking United International Famine Relief Committee organized surveys in some rural areas on the situation of poor families and the trafficking of women and children	Governance/Management	Behavioral	International, Local	Institution/Organization	Socioeconomic (social stability: crime)
Jing-Jin-Ji (China)	1920 drought event	The starving people ate leaves, tree bark, chaff, etc. as substitutes for normal food	Consumption	Behavioral	Local	Individual/Household	Socioeconomic (food security)
Jing-Jin-Ji (China)	1920 drought event	The starving people sold their clothes, livestock, farming tools, farmland, and even family members (esp. kids) at very low prices to obtain money for food	Consumption	Behavioral	Local	Individual/Household	Socioeconomic (food security: high food price)
Jing-Jin-Ji (China)	1920 drought event	The starving people relocated from drought-affected areas along the railways to find jobs, beg, or rob in big cities or less affected areas	Consumption	Behavioral	Subnational, Local	Individual/Household	Socioeconomic (food security)
Jing-Jin-Ji (China)	1920 drought event	Some affected farmers changed their livelihoods (i.e., turning to traditional fallback means of survival, such as basket and mat weaving and earth-salt production) to obtain money for food	Consumption	Behavioral	Local	Individual/Household	Socioeconomic (food security: high food price)
Jing-Jin-Ji (China)	1920 drought event	Local officials and rich people, warlord of the Northeast China, and several local and international relief societies bought grains from less affected areas	Consumption	Behavioral	International, Subnational, Local	Government, Institution/Organization, Civil society, Individual/Household	Socioeconomic (food security)
Jing-Jin-Ji (China)	1920 drought event	Grain merchants, native-place associations in less affected areas, local and international relief societies, and multiple levels of government worked together to transport relief grains to drought-affected areas mainy by trains	Consumption	Behavioral	International, National, Subnational, Local	Government, Institution/Organization, Private sector, Civil society	Socioeconomic (food security)
Jing-Jin-Ji (China)	1920 drought event	Individuals, native-place associations in less affected areas, local and international relief societies, and local officials worked together to organize the release of grain reserves in local civilian granary system (e.g., community granary 社仓), in order to curb grain prices on the market	Consumption	Behavioral	International, Subnational, Local	Government, Institution/Organization, Civil society, Individual/Household	Socioeconomic (food security: high food price)
Jing-Jin-Ji (China)	1920 drought event	Individuals, local and international companies, local relief societies, and multiple levels of government established soup kitchens in cities and towns within drought-affected areas and provided starving people with porridge relief	Consumption	Behavioral	International, National, Local	Government, Institution/Organization, Private sector, Individual/Household	Socioeconomic (food security)
Jing-Jin-Ji (China)	1920 drought event	Local and international relief societies distributed relief grains to limited destitute families that were selected by drawing lots, due to insufficient funds	Consumption	Behavioral	International, Local	Institution/Organization	Socioeconomic (food security)
Jing-Jin-Ji (China)	1920 drought event	The railway department arranged special trains to relocate starving people from drought-affected areas to less-affected areas	Consumption	Behavioral	Subnational	Government	Socioeconomic (food security)
Jing-Jin-Ji (China)	1920 drought event	The railway department and the Red Cross organized work relief (i.e., providing affected people with work opportunities to earn money by constructing several railways that did not pass through drought-affected areas)	Consumption	Behavioral	International, National, Subnational	Government, Institution/Organization	Socioeconomic (food security)
Jing-Jin-Ji (China)	1920 drought event	Native-place associations in less affected areas, missionaries, native military organizations, local and international relief societies, and multiple levels of government worked together to raise, transport and distribute clothes to the displacement, in order to help them survive the coming winter	Consumption	Behavioral	International, National, Subnational, Local	Government, Institution/Organization, Civil society	Socioeconomic (health: freeze to death)
Jing-Jin-Ji (China)	1920 drought event	Drought-affected households tore down their houses and burned them, due to the lack of straw for fuel caused by harvest failure	Consumption	Behavioral	Local	Individual/Household	Socioeconomic (energy: fuel)
Jing-Jin-Ji (China)	1920 drought event	A local Catholic Church donated some coal to the Zhengding County (one of the affected areas in the Hebei province)	Consumption	Behavioral	Local	Civil society	Socioeconomic (energy: fuel)
Jing-Jin-Ji (China)	1920 drought event	Peking United International Famine Relief Committee provided limited financial support to student’s parents in some rural areas	Consumption	Behavioral	Local	Institution/Organization	Socioeconomic (economy)
Jing-Jin-Ji (China)	1920 drought event	City administrations within drought-affected areas (e.g., Beijing, Tianjin) built temporary shelters on outskirts of cities to resettle the displaced	Consumption	Behavioral	Local	Government	Socioeconomic (social stability: displacement and migration)
Jing-Jin-Ji (China)	1920 drought event	Gentry, native charitable societies, and governments in migrant destinations helped to resettle migrants to by providing them with food, shelter, and money for making a living in the new place	Consumption	Behavioral	Subnational	Government, Institution/Organization, Individual/Household	Socioeconomic (social stability: displacement and migration)
Jing-Jin-Ji (China)	1920 drought event	The central government imposed additional taxes on various sectors, such as transpoortation and liquor production, for general drought relief	Consumption	Behavioral	National	Government	Socioeconomic
Jing-Jin-Ji (China)	1920 drought event	Hundreds of people living in the north of Beijing prayed for rain	Production	Behavioral	Local	Individual/Household	Meteorological (precipitation deficits)
Jing-Jin-Ji (China)	1920 drought event	Local government provided wheat seeds and missionaries distributed them to drought-affected farmers	Production	Behavioral	International, Local	Government, Civil society	Agricultural (crop)
Jing-Jin-Ji (China)	1920 drought event	The government of Hebei province, local relief groups, and international relief societies provided financial support for digging new wells in drought-affected areas	Production	Infrastructural	International, Local	Government, Institution/Organization, Civil society	Socioeconomic (water security)
Jing-Jin-Ji (China)	1997 drought event	Central government adopted "The Meteorological Law of the People's Republic of China", in order to regulate meteorological monitoring and improve the accuracy of weather forecasts	Governance/Management	Institutional	National	Government	Meteorological
Jing-Jin-Ji (China)	1997 drought event	China Meteorological Administration and local meteorological institutes provided medium- and long- term weather forecasts, in order to support analyzing drought trends	Governance/Management	Technological	National, Local	Institution/Organization	Meteorological
Jing-Jin-Ji (China)	1997 drought event	The government of Shijiazhuang city deployed more than ten sprinklers to sprinkle water on main streets, in order to lower the surface temperature	Governance/Management	Behavioral	Local	Government	Meteorological (heatwaves)
Jing-Jin-Ji (China)	1997 drought event	National Forestry Administration required and guided local forestry agencies to use existing facilities and technologies to protect tree seedlings from drought damage	Governance/Management	Behavioral	National	Government	Ecological (vegetation: plant)
Jing-Jin-Ji (China)	1997 drought event	The State Council and the National Forestry Administration convened a conference on wildfire risk assessment and prevention	Governance/Management	Behavioral	National	Government	Ecological (vegetation: wildfire)
Jing-Jin-Ji (China)	1997 drought event	The Ministry of Agriculture, National Forestry Administration, and local forestry agencies conducted a comprehensive inspection of fire prevention work in forests and grasslands, in order to recude risks of wildfire	Governance/Management	Behavioral	National, Local	Government, Institution/Organization	Ecological (vegetation: wildfire)
Jing-Jin-Ji (China)	1997 drought event	The Armed Police Force, National Forestry Administration, and provincial governments jointly established the command of armed police forestry forces, in order to strengthen the capacity to dispatch cross-regioanl assistance, prevent, control, and extinguish wildfires	Governance/Management	Institutional	National, Subnational, Local	Government, Institution/Organization	Ecological (vegetation: wildfire)
Jing-Jin-Ji (China)	1997 drought event	The local governments of Beijing city and Heibei province worked together to speed up reforestation, in order to reduce exposure of the capital to dust storms	Governance/Management	Behavioral	Subnational	Government	Ecological (soil: dust storm)
Jing-Jin-Ji (China)	1997 drought event	The Ministry of Agriculture and the People' Daily worked together to publicize and promote conservation tillage, which could reduce soil erosion on croplands and consequently reduce the frequency of dust storms	Governance/Management	Technological	National	Government, Private sector	Ecological (soil: dust storm)
Jing-Jin-Ji (China)	1997 drought event	The central and local governments strengthened coordination among different departments, institutes and agencies, and media to ensure the supply of information, funds, materials and energy for mitigating drought damage to crops and, meanwhile, mobilized farmers to fight against drought	Governance/Management	Behavioral	National, Local	Government	Agricultural (crop)
Jing-Jin-Ji (China)	1997 drought event	The Ministry of Agriculture prepared "Plan for the construction of water-saving dryland agriculture"	Governance/Management	Institutional	National	Government	Agricultural
Jing-Jin-Ji (China)	1997 drought event	The government of Cangzhou city reviewed anti-drought work in 1997 and proposed future directions for reducing agricultural vulnerability in response to current inadequacies	Governance/Management	Behavioral	Local	Government	Agricultural
Jing-Jin-Ji (China)	1997 drought event	People' Daily reviewed anti-drought work in 2001, pointed out the inadequacies of disaster relief, and suggested new ideas of water conservancy construction that integrated the consideration of agricultural production and ecological water requirements	Governance/Management	Technological	National	Private sector	Agricultural; Ecological
Jing-Jin-Ji (China)	1997 drought event	The Ministry of Water Resources summed up the successful experience in solving the cessation of the Yellow River's flow, proposed the need of changing concept of water resources management, and emphasized on basin-wide management	Governance/Management	Technological	National	Government	Hydrological (river: cutoff)
Jing-Jin-Ji (China)	1997 drought event	Several departments of the central government worked together with the Yellow River Conservancy Commission and other institutes in attempting to solve the cessation of the Yellow River's flow by basin-wide water scheduling, in order to enable the transfer of water to drought-affected areas in the future	Governance/Management	Technological	National	Government, Institution/Organization	Hydrological (river: cutoff)
Jing-Jin-Ji (China)	1997 drought event	The central government and local civil affairs bureau convened a conference on evaluating food insecurity in rural areas in spring 2000	Governance/Management	Behavioral	National, Local	Government	Socioeconomic (food security)
Jing-Jin-Ji (China)	1997 drought event	The Ministry of Water Resources together with the government of Beijing city prepared a five-year plan for the sustainable use of water resources in the capital	Governance/Management	Institutional	National, Local	Government	Socioeconomic (water security)
Jing-Jin-Ji (China)	1997 drought event	The central government enacted and amended laws to strengthen the legal responsibility for water resources management, thereby promoting water conservation and coordinating water resource protection and social development	Governance/Management	Institutional	National	Government	Socioeconomic (water security)
Jing-Jin-Ji (China)	1997 drought event	The Ministry of Water Resources decided to publish "Ten-day report on the quality of major water sources for important cities " every ten days, in order to arouse social concern about water resource quality and water security	Governance/Management	Institutional	National	Government	Socioeconomic (water security)
Jing-Jin-Ji (China)	1997 drought event	Nationwide newspapers (i.e., People's Daily, Xinhua News Agency) interviewed drought-affected people, experts, and water resource authorities and published articles that stressed the urgency of water resource shortage, promoted measures for pollution control and water conservation, and appealled to the whole society to take action	Governance/Management	Behavioral	National	Private sector	Socioeconomic (water security)
Jing-Jin-Ji (China)	1997 drought event	The Chinese Academy of Engineering organized a three-year research on water resources strategy for sustainable development, in order to provide scientific support for policy making	Governance/Management	Technological	National	Institution/Organization	Socioeconomic (water security)
Jing-Jin-Ji (China)	1997 drought event	The Ministry of Water Resources and State Planning Commission carried out nationwide programming of integrated water resources planning, functional watershed zonation, and carrying capacity assessment, in order to provide support for decision-making on water resources management	Governance/Management	Technological	National	Government	Socioeconomic (water security)
Jing-Jin-Ji (China)	1997 drought event	The Ministry of Water Resources and local water authorities developed various levels of anti-drought service teams, which undertook tasks including field irrigation, equipment maintenance, facility construction, and water use coordination, in order to improve the anti-drought service system in rural areas	Governance/Management	Institutional	National, Local	Government	Socioeconomic (water security; water conflict); Agricultural
Jing-Jin-Ji (China)	1997 drought event	The Ministry of Health required the fully implementation of sanitary and epidemiological measures to prevent epidemics in disaster-affected areas	Governance/Management	Behavioral	National	Government	Socioeconomic (health: risk of epidemic)
Jing-Jin-Ji (China)	1997 drought event	The National Meteorological Center and Beijing Meteorological Observatory gave health advice on dealting with hot weathers and high UV radiation	Governance/Management	Technological	Local	Institution/Organization	Socioeconomic (health)
Jing-Jin-Ji (China)	1997 drought event	After the severe fire disaster in a furniture market in Beijing city, the central government required fire-prone public places to check for fire hazard and, meanwhile, promoted the construction of fire-fighting infrastructures	Governance/Management	Infrastructural, Behavioral	National	Government	Socioeconomic (economy: fire-induced private property losses)
Jing-Jin-Ji (China)	1997 drought event	Local public security authorities and fire brigades actively prepared for fire disasters	Governance/Management	Behavioral	Local	Government, Institution/Organization	Socioeconomic (economy: fire-induced private property losses)
Jing-Jin-Ji (China)	1997 drought event	The central government together with multi-level civil affairs bureau developed a emergency response plan for fire disaster to make sure that affected people could receive life necessities within 24 hours	Governance/Management	Institutional	National, Local	Government	Socioeconomic (economy: fire-induced private property losses)
Jing-Jin-Ji (China)	1997 drought event	The Ministry of Water Resources together with governments of Hebei province and Henan province organized consultations to resolve water conflicts between residents on both sides of the Zhanghe River (a boundary river between Heibei and Henan provinces)	Governance/Management	Behavioral	National, Local	Government	Socioeconomic (social stability: water conflict)
Jing-Jin-Ji (China)	1997 drought event	Local anti-drought service teams organized and coordinated the use of water to avoid water conflicts	Governance/Management	Behavioral	Local	Institution/Organization	Socioeconomic (social stability: water conflict)
Jing-Jin-Ji (China)	1997 drought event	The Ministry of Civil Affairs and the Ministry of Finance allocated RMB 522.9 million as China Welfare Lottery Disaster Relief Special Collection Funds to support disaster relief	Governance/Management	Behavioral	National	Government	Socioeconomic
Jing-Jin-Ji (China)	1997 drought event	The State Council worked together with China National Committee for IDNDR to formulate the “Disaster Reduction Plan of the People's Republic of China (1998-2010)”	Governance/Management	Institutional	National	Government, Institution/Organization	Socioeconomic
Jing-Jin-Ji (China)	1997 drought event	The leaders of central and local governments went to the drought-affected rural areas, assessed drought impacts on agricultural production and economic activities, and assisted in the organization and coordination of disaster relief	Governance/Management	Behavioral	National, Local	Government	Socioeconomic; Agricultural
Jing-Jin-Ji (China)	1997 drought event	The central government convened regular meetings with the participation of local governments and experts, during which drought trends and impacts (esp. insect plague, crop performance, food and water security), effectiveness of adopted measures, and current difficulties were assessed, emergency plans were formulated, and the focuses of work were adjusted according to drought development	Governance/Management	Behavioral	National, Local	Government, Institution/Organization	Socioeconomic; Hydrological; Agricultural; Ecological; Meteorological
Jing-Jin-Ji (China)	1997 drought event	Individuals changed their consumption options for entertainment (e.g., spending holidays in mountainous areas to escape hot summers), to better adapt to hot weathers	Consumption	Behavioral	Local	Individual/Household	Meteorological (heatwaves)
Jing-Jin-Ji (China)	1997 drought event	The government of Beijing city implemented the groundwater recharge project to restore the water table, namely to increase the supply of groundwater through artificial means such as constructing infiltration basins, ditches, dams, and injection wells	Consumption	Technological	Local	Government	Hydrological (groundwater: dropped water level)
Jing-Jin-Ji (China)	1997 drought event	The Ministry of Water Resources, State Planning Commission, and the government of Tianjin city issued restrictions on directly taking water from surface water and groundwater for construction projects and some service industries (e.g., car washing)	Consumption	Behavioral	National, Local	Government	Hydrological
Jing-Jin-Ji (China)	1997 drought event	The central government and the Agricultural Development Bank of China maintained market grain prices within an appropriate range through ensuring the income of grain producer, such as establishing grain purchase policies, introducing protection producer prices, and compensating local farmers and governments with the Grain Risk Fund	Consumption	Institutional, Behavioral	National	Government, Private sector	Socioeconomic (food security)
Jing-Jin-Ji (China)	1997 drought event	The central government invested in the maintenance and construction of national-level granaries that were directly administered, in order to enhance the capacity of grain storage and macro-control	Consumption	Infrastructural	National	Government	Socioeconomic (food security)
Jing-Jin-Ji (China)	1997 drought event	The central and local governments adpoted different forms of food relief to drought-affected farmers according to their poverty level (e.g., local governments lended grains to food-deficit households that still had some ability of for self-help, central government directly distributed relief food to destitute households)	Consumption	Behavioral	National, Local	Government	Socioeconomic (food security)
Jing-Jin-Ji (China)	1997 drought event	Local governments encouraged donations (e.g., materials and money) from all segments of society to fill the gap in food and financial relief	Consumption	Behavioral	Local	Government	Socioeconomic (food security, economy)
Jing-Jin-Ji (China)	1997 drought event	The government and citizens of Tianjin city donated food, oil, clothes, and money to the people living around the Panjiakou Reservoir, who were also severely affected by drought but made sacrifices in agricultural production to ensure water supply to Tianjin city, as a token of appreciation and compensate	Consumption	Behavioral	Subnational	Government, Individual/Household	Socioeconomic (food security; economy: decrease in income)
Jing-Jin-Ji (China)	1997 drought event	The central and local governments set up special funds to support the construction of water conservation facilities	Consumption	Infrastructural	National, Local	Government	Socioeconomic (water security)
Jing-Jin-Ji (China)	1997 drought event	The Ministry of Water Resources established the National Water Conservation Office and published a water conservation supervision telephone number, which welcomes the whole society to supervise and report water-wasting behaviours	Consumption	Institutional	National	Government	Socioeconomic (water security)
Jing-Jin-Ji (China)	1997 drought event	The Ministry of Water Resources together with the media (i.e., newspapers, TV stations, and radio stations) organized a national competition on water conservation knowledge, which provided generous prizes for the winners, in order to raise the awareness of society on water conservation as well as promote relevant knowledge	Consumption	Technological	National	Government, Private sector	Socioeconomic (water security)
Jing-Jin-Ji (China)	1997 drought event	To improve water utilisation, the government of Beijing city encouraged the use of treated urban wastewater for green space irrigation, road and toilet cleaning, and industrial cooling water, which had been responded to by about a hundred hotels, restaurants, schools, and universities	Consumption	Behavioral	Local	Government, Institution/Organization, Private sector	Socioeconomic (water security)
Jing-Jin-Ji (China)	1997 drought event	The central and local governments increased the cost of using water to reduce water-wasting behaviour (e.g., introducing step pricing for urban water use, imposing sewage charges)	Consumption	Behavioral	National, Local	Government	Socioeconomic (water security)
Jing-Jin-Ji (China)	1997 drought event	The central and local governments cooperated in the implementation of cross-regional water transport projects, which brought water from the Yellow River and other rivers to water-scarce areas (esp. Tianjin city), to alleviate tensions in urban water use and difficulties in rural drinking water supply	Consumption	Behavioral	National, Subnational	Government	Socioeconomic (water security: drinking water supply, other usage)
Jing-Jin-Ji (China)	1997 drought event	Local governments, multi-level anti-drought service teams, enterprises and other sectors of society participated in transporting water to water-scarce areas, in order to ensure the basic needs of drought-affected people	Consumption	Behavioral	Subnational	Government, Institution/Organization, Private sector, Civil society	Socioeconomic (water security)
Jing-Jin-Ji (China)	1997 drought event	Governments of Beijing city and Tianjin city issued restrictions on water use to ensure basic domestic water needs and to alleviate urban water scarcity, such as shutting down car washing businesses, prohibiting watering gardens, restricting water use by water-consuming enterprises, and limiting water use by citizens)	Consumption	Behavioral	Local	Government	Socioeconomic (water security: other use)
Jing-Jin-Ji (China)	1997 drought event	The Ministry of Water Resources accelerated the implementation of the South–North Water Transfer Project, which was designed to tranport excess water resources from the south part of China (rich in water) to the north (lack of water)	Consumption	Infrastructural	National	Government	Socioeconomic (water security)
Jing-Jin-Ji (China)	1997 drought event	Local governments in the Hebei province invested in the construction of water supply plants and water pipelines, in order to address difficulties in drinkg water supply in rural areas	Consumption	Infrastructural	Local	Government	Socioeconomic (water security: drinkng water)
Jing-Jin-Ji (China)	1997 drought event	Several departments of the central government participated in standardizing the production of water-saving domestic water appliances and provide support for the promotion of standardised products (e.g., listing them as the first choice for government and corporate procurement)	Consumption	Technological	National	Government	Socioeconomic (water security)
Jing-Jin-Ji (China)	1997 drought event	Beijing city planned to adjust its industrial structure and distribution within five years, including the elimination of high water-consuming processes and equipment, the restriction of high water-consuming industrial projects, and the promotion of new industrial water-saving technologies and equipment	Consumption	Technological, Infrastructural	Local	Government	Socioeconomic (water security)
Jing-Jin-Ji (China)	1997 drought event	A company affiliated with Beijing Normal University developed a digital water conservation management system to improve water conservation rate in public bathrooms	Consumption	Technological	Local	Private sector	Socioeconomic (water security)
Jing-Jin-Ji (China)	1997 drought event	The government of Tianjin city issued a regulation that mandated the installation of water meter and water-saving irrigation equipment in green areas and gardens attached to newly constructed buildings	Consumption	Institutional	Local	Government	Socioeconomic (water security)
Jing-Jin-Ji (China)	1997 drought event	The State Economic and Trade Commission organized demonstration projects in the field of water conservation to support the practical application of breakthrough technologies	Consumption	Technological	National	Government	Socioeconomic (water security)
Jing-Jin-Ji (China)	1997 drought event	Emergency water source facilities were constructed, which were invested by the central government and local banks and completed by local goverments, to address water scarcity in rural areas	Consumption	Infrastructural	National, Local	Government, Private sector	Socioeconomic (water security: drinking water supply, other usage)
Jing-Jin-Ji (China)	1997 drought event	The central government invested, the local government constructed and the media publicized agricultural water-saving irrigation facilities and technologies	Consumption	Technological, Infrastructural	National, Local	Government, Private sector	Socioeconomic (water security)
Jing-Jin-Ji (China)	1997 drought event	Power companies in affected areas activated the entire reserve margin of electric power systems to alleviated electricity shortages	Consumption	Behavioral	Local	Private sector	Socioeconomic (energy: electricity)
Jing-Jin-Ji (China)	1997 drought event	The power sector in Hebei province gave priority to agricultural power consumption, which was used to fighting against drought	Consumption	Behavioral	Local	Private sector	Socioeconomic (energy: electricity)
Jing-Jin-Ji (China)	1997 drought event	In response to the current imbalance between the supply and demand of electricity in the east and west parts of China, projects such as cross-regional power grid interconnection and long-disatance electricity transport (i.e., west-to-east power transmission program) were carried out with the organization of the central government and the participation of local power companies	Consumption	Institutional, Infrastructural	National, Subnational	Government, Private sector	Socioeconomic (energy: electricity)
Jing-Jin-Ji (China)	1997 drought event	The Department of Petroleum in Hebei province cut fuel prices to ensure affordable fuel for anti-drought machinery	Consumption	Behavioral	Local	Government	Socioeconomic (energy: fuel)
Jing-Jin-Ji (China)	1997 drought event	Under the guidance of the central government, local governments promoted the diversification of livelihood modes (e.g., switching to cash crops farming, organizing temporary labour migration) to expand the income sources of drought-affected farmers, in order to compensate for drought-induced economic loss	Consumption	Behavioral	National, Local	Government	Socioeconomic (economy: decrease in income)
Jing-Jin-Ji (China)	1997 drought event	Drought-affected farmers left their hometowns and sought work in the cities, in order to compensate for their economic loss and meet the urgent needs of their families	Consumption	Behavioral	Subnational	Individual/Household	Socioeconomic (economy: decrease in income)
Jing-Jin-Ji (China)	1997 drought event	The State Planning Commission set up special funds for organizing work relief (e.g., constucting emergency water sources in drought-affected areas), in order toraising the income of drought-affected people	Consumption	Behavioral	National	Government	Socioeconomic (economy: decrease in income)
Jing-Jin-Ji (China)	1997 drought event	In the face of water restrictions, car wash industry in the Tianjin city switched to waterless wash (i.e., wiping cars with car shampoo) to reduce their income loss	Consumption	Behavioral	Local	Private sector	Socioeconomic (economy: decrease in income)
Jing-Jin-Ji (China)	1997 drought event	The central government eased the burden on farmers and local governments in drought-affected areas through tax reductions, exemptions, and transfer payments	Consumption	Behavioral	National	Government	Socioeconomic (economy: decrease in income)
Jing-Jin-Ji (China)	1997 drought event	The Ministry of Finance carried out inspections of agricultural tax exemption and subsidies distribution to ensure that drought-affected farmers and ranchers actually received the financial subsidies	Consumption	Behavioral	National	Government	Socioeconomic (economy: decrease in income)
Jing-Jin-Ji (China)	1997 drought event	The Agricultural Bank of China simplified the loan procedures so that drought-affected farmers and enterprises could easily obtain affordable loans to solve their lack of money for the reproduction of agriculture due to economic losses	Consumption	Behavioral	Local	Private sector	Socioeconomic (economy: decrease in income)
Jing-Jin-Ji (China)	1997 drought event	The central government requested strict control of the implementation of construction projects in the drought-affected areas, in order to reduce the expenses of drought-affected people	Consumption	Behavioral	National	Government	Socioeconomic (economy: decrease in income)
Jing-Jin-Ji (China)	1997 drought event	Local governments implemented cloud seeding to increase rain	Production	Behavioral	Local	Government	Meteorological
Jing-Jin-Ji (China)	1997 drought event	Finance departments of the central and local governments established special funds for locust control, in order to reduce risks to crops	Production	Behavioral	National, Local	Government	Ecological (vegetation: insect plague)
Jing-Jin-Ji (China)	1997 drought event	Agricultural departments of the central and local governments convened a conference on locust control, in order to reduce risks to crops	Production	Behavioral	National, Local	Government	Ecological (vegetation: insect plague)
Jing-Jin-Ji (China)	1997 drought event	The Ministry of Agriculture strengthened research on low-polluting, low-cost and highly effective technologies for locust control, in order to reduce risks to crops	Production	Technological	National	Government	Ecological (vegetation: insect plague)
Jing-Jin-Ji (China)	1997 drought event	Hebei province and Tianjin city carried out aircraft locust control operation, in order to reduce risks to crops	Production	Technological	Local	Government	Ecological (vegetation: insect plague)
Jing-Jin-Ji (China)	1997 drought event	In drought-affected rural areas, technicians from the Chinese Academy of Agricultural Sciences and water resource agency conducted drought and loctus surveys and provided farmers with technical guidance on drought resistance, in order to reduce drought damage to crop production	Production	Technological	Local	Institution/Organization	Ecological (vegetation: insect plague); Agricultural (crop)
Jing-Jin-Ji (China)	1997 drought event	The Ministry of Agriculture, National Meteorological Center, and Xinhua News Agency jointly provided advice on protecting crops from drought damage	Production	Technological	National	Government, Institution/Organization, Private sector	Agricultural (crop)
Jing-Jin-Ji (China)	1997 drought event	Local farmers and anti-drought service teams actively irrigated fields to improve soil moisture so as to make the unseeded land ready for planting and to reduce losses of crops on sown land	Production	Behavioral	Local	Institution/Organization, Individual/Household	Agricultural (soil moisture; crop)
Jing-Jin-Ji (China)	1997 drought event	Local people, anti-drought service teams, and governments constructed water conservancy facilities for irrigating fields	Production	Infrastructural	Local	Government, Institution/Organization, Individual/Household	Agricultural (crop)
Jing-Jin-Ji (China)	1997 drought event	The Ministry of Agriculture and multi-level governments of Hebei province promoted non-engineering anti-drought measures in agriculture, such as dry farming techniques and drought-resistant agent	Production	Technological	National, Local	Government	Agricultural (crop)
Jing-Jin-Ji (China)	1997 drought event	Drought-affected farmers replanted other crops (esp. drought-resistant crops) to compensate for missed planting of summer maize	Production	Behavioral	Local	Individual/Household	Agricultural (crop)
Jing-Jin-Ji (China)	1997 drought event	Drought-affected farmers adopted late sowing techniques for wheat, in order to reduce risks of yield losses due to not planting at an optimum time	Production	Technological	Local	Individual/Household	Agricultural (crop)
Jing-Jin-Ji (China)	1997 drought event	Drought-affected farmers resorted to sowing crops as scheduled and waiting for rain or raising seedlings for planting, in order to reduce risks of missing the optimum time to sow	Production	Behavioral	Local	Individual/Household	Agricultural (crop)
Jing-Jin-Ji (China)	1997 drought event	Under the guidance of the central government, local governments and drought-affected farmers expanding the area of autumn crops, hoping to compensating for the losses of summer crops with a good autumn harvest	Production	Behavioral	National, Local	Government, Individual/Household	Agricultural (crop)
Jing-Jin-Ji (China)	1997 drought event	Under the guidance of local governments, farmers in several drought-affected counties adjusted planting structure of crops, such as replacing wheat and maize with drought-resistant crops (e.g., sweet potatos) in the mountainous areas	Production	Technological	Local	Government, Individual/Household	Agricultural (crop)
Jing-Jin-Ji (China)	1997 drought event	The government of Shijiazhuang city selected around a hundred drought-resistant crop species and promoted them	Production	Technological	Local	Government	Agricultural (crop)
Jing-Jin-Ji (China)	1997 drought event	The central and local governments allocated special funds for fighting against agricultural drought (e.g., buying materials and equipment, constructing water conservancy facilities)	Production	Infrastructural, Behavioral	National, Local	Government	Agricultural
Jing-Jin-Ji (China)	1997 drought event	Local anti-drought service teams provided supporting services for anti-drought agricultural machinery, including sale, lease, and maintenance	Production	Infrastructural	Local	Institution/Organization	Agricultural (crop)
Jing-Jin-Ji (China)	1997 drought event	The government of Beijing city constructed several new sewage treatment plants for the harmless treatment of urban wastewater, in order to protect water sources from being polluted	Production	Infrastructural	Local	Government	Socioeconomic (water security)
Jing-Jin-Ji (China)	1997 drought event	A nine-year technical cooperation project Beijing forestry agency and German experts were conducted to protect Beijing's water sources by reducing soil erosion in the area around the Miyun Reservoir	Production	Technological	National, Local	Institution/Organization	Socioeconomic (water security)
Jing-Jin-Ji (China)	1997 drought event	Governemts of Beijing city, Tianjin city, and Hebei province worked together to obtaion water sources with acceptable quality through measures such as controlling soil erosion, shutting down polluting enterprises, regulating the disposal of domestic waste, and shifting to eco-tourism and other livelihoods	Production	Behavioral	Local	Government	Socioeconomic (water security)
Jing-Jin-Ji (China)	1997 drought event	The Ministry of Water Resources sent technicians to drought-affected areas to assist local people in drilling wells	Production	Technological, Infrastructural	National, Local	Government, Individual/Household	Socioeconomic (water security)
Jing-Jin-Ji (China)	1997 drought event	Water-scarce cities alleviated water scarcity by expanding emergency water sources, such as activating back-up water sources, using groundwater sources, and constructing new water source facilities	Production	Infrastructural, Behavioral	Local	Government	Socioeconomic (water security)
Jing-Jin-Ji (China)	1997 drought event	The government of Hebei province prohibited the use of use of phosphorus-containing detergents to reduce pollution of urban drinking water sources, thereby ensuring that cities had access to drinking water with acceptable quality	Production	Behavioral	Local	Government	Socioeconomic (water security: drinkng water)
Jing-Jin-Ji (China)	1997 drought event	The government of Hebei province set up special funds to support the construction of sewage treatment plants and waste treatment plants as well as research on facilities, equipment, and technology in the field of environmental protection, so as to better protect water sources from being polluted	Production	Infrastructural	Local	Government	Socioeconomic (water security)
Jing-Jin-Ji (China)	1997 drought event	The government of Beijing city constructed water conservancy facilities for surface water retention and rainwater harvesting, in order to expanding water sources by collecting rainwater	Production	Infrastructural	Local	Government	Socioeconomic (water security)
Jing-Jin-Ji (China)	1997 drought event	North China Power Company switched on oil-fired generator sets to compensate for decreases in hydroelectricity	Production	Behavioral	Local	Private sector	Socioeconomic (energy: electricity)
