# Supplementary material for: Stable yet dynamic: a cross-era comparative case study of drought impacts and social responses in Germany and Jing-Jin-Ji Region (China)
Source: Copernicus journal article supplement (doi:10.5194/cp-21-1481-2025), 2025-08-29
Supplement: Supplementary file 1 [file cp-21-1481-2025-supplement.zip]

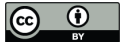

*Supplement of*

**Stable yet dynamic: a cross-era comparative case study of drought impacts and social responses in Germany and Jing-Jin-Ji Region (China)**

**Diyang Zhang et al.**

*Correspondence to:* Diyang Zhang ([diyang.zhang@geographie.uni-freiburg.de](mailto:diyang.zhang@geographie.uni-freiburg.de))

- [cp-21-1481-2025-supplement-title-page.pdf](#)
- [Supplement S1\\_list of data sources.xlsx](#)
- [Supplement S2\\_keywords for drought categories and description examples.pdf](#)
- [Supplement S3\\_drought effects and impacts.xlsx](#)
- [Supplement S4\\_social responses.xlsx](#)

The copyright of individual parts of the supplement might differ from the article licence.
