# Supplementary material for: Stable yet dynamic: a cross-era comparative case study of drought impacts and social responses in Germany and Jing-Jin-Ji Region (China)
Source: Copernicus journal article supplement (doi:10.5194/cp-21-1481-2025), 2025-08-29
Supplement: Supplementary file 2 [file Supplement S1_list of data sources.xlsx]

## Sheet: Supplement S1
Study area	Event	Type	Data source	Commentary
Germany	1834 drought event, 1921 drought event	Database & Information platform	Tambora.org	Riemann, D., Glaser, R., Kahle, M., and Vogt, S.: The CRE tambora.org – new data and tools for collaborative research in climate and environmental history, Geoscience Data Journal, 2, 63–77, https://doi.org/10.1002/gdj3.30, 2015.
Germany	1921 drought event	Database & Information platform	Undine: Information platform on hydrological extreme events (floods, low flow). https://undine.bafg.de/index_en.html (last accesse: 26 February 2024).
Germany	1834 drought event	Chronicle & Compilation	Wetterchronik 1800-1899
Germany	1834 drought event	Chronicle & Compilation	Dürr, F.: Chronik der Stadt Heilbronn. Band I: 741-1895. Unveränderter Nachdruck der 2. Aufl. von 1926, Heilbronn, 1986.
Germany	1834 drought event	Chronicle & Compilation	Stuttgart Chronikschreiber (1275-1846)
Germany	1834 drought event	Chronicle & Compilation	Glaser, R., Schenk, W., and Schröder, A.: Die Hauschronik der Wiesenbronner Familie Hüßner. Ihre Aufzeichnungen zu Wirtschaft, Geschichte, Klima und Geographie Mainfrankens von 1750-1894, Materialien zur Erforschung früher Umwelten (MEFU), 1–57, 1991.
Germany	1834 drought event, 1921 drought event	Newspaper	Freiburger Zeitung. https://fz.ub.uni-freiburg.de/show/fz.cgi?pKuerzel=FZ (last access: 1 March 2023).	Edition from: 20/07/1834; 19/08/1834; 21/10/1834 03/07/1921; 11/07/1921; 13/07/1921; 10/08/1921; 11/08/1921
Germany	1834 drought event	Newspaper	Züllichauer wöchentliche Nachrichten. https://dfg-viewer.de/show/?set%5Bmets%5D=https://content.staatsbibliothek-berlin.de/zefys/SNP29377559-18340817-0-0-0-0.xml (last access: 1 March 2023).	Edition from: 17/08/1834
Germany	1921 drought event	Newspaper	Berliner Tageblatt. https://zefys.staatsbibliothek-berlin.de/list/title/zdb/27646518/-/1921/#jul. (last access: 1 March 2023).	Edition from: 30/07/1921; 31/07/1921
Germany	2018 drought event	Newspaper	Kahle, M.: Zeitungsmeldungen zur Dürre in Deutschland im Jahr 2018, https://doi.org/10.6094/UNIFR/244163, 2024.
Germany	2018 drought event	Newspaper	Herrmann, U.: Dürre in Niedersachsen:Wasser nur noch vom Supermarkt, Die Tageszeitung, https://taz.de/Duerre-in-Niedersachsen/!5701874/ (last access: 22 April 2024), 9 August, 2020.	Edition from: 09/08/2020
Germany	2018 drought event	Newspaper	Dick, W.: Wassernotstand in Deutschland, Deutsche Welle, https://www.dw.com/de/wassernotstand-in-deutschland/a-54668837 (last access: 22 April 2024), 24 August, 2020.	Edition from: 24/08/2020
Germany	1834 drought event	Yearbook	Burgbernheim: Jahrbuch des Marktes Burgbernheim. 1. 1833/34, Ansbach : Brügel, 1834.
Germany	1834 drought event	Yearbook	Burgbernheim: Jahrbuch des Marktes Burgbernheim. 2. 1834/35, Ansbach : Brügel, 1835.
Germany	2018 drought event	Report	BMEL: Ernte 2018: Mengen und Preise, Berlin, 2018.
Germany	2018 drought event	Report	BMEL: Ernte 2019: Mengen und Preise, Berlin, 2019.
Germany	2018 drought event	Report	BMEL: Ernte 2020: Mengen und Preise, Berlin, 2020.
Germany	2018 drought event	Report	BMEL: Ernte 2021: Mengen und Preise, Berlin, 2021.
Germany	2018 drought event	Report	Kutschera, K.: Vom Wassernotstand zum integrierten Wasserkonzept, Wasser und Abfall, 23, 12–15, https://doi.org/10.1007/s35152-021-0618-1, 2021.
Germany	2018 drought event	Report	Creutzfeldt, B., Pohle, I., Zeilfelder, S., Birner, J., Köhler, A., von Seggern, D., and Rehfeld-Klein, M.: DIE NIEDRIGWASSERJAHRE 2018, 2019 UND 2020: Analysen und Auswirkungen für das Land Berlin, Berlin, 2021.
Germany	2018 drought event	Report	Riedel, T., Nolte, C., aus der Beek, T., and Liedtke, J.: Niedrigwasser, Dürre und Grundwasserneubildung – Bestandsaufnahme zur gegenwärtigen Situation in Deutschland, den Klimaprojektionen und den existierenden Maßnahmen und Strategien, Essen, 2021.
Jing-Jin-Ji (China)	1832 drought event	Database & Information platform	The Integrated Natural Disaster Information System of Qing Dynasty	Xia, M.: Big data and ecological history: The compilation and database construction of the historical sources of Chinese disaster history in an information age, The Qing History Journal, 67–82, 2015. Fang, X., Zhao, W., Song, R., Chen, S., and Ye, Y.: The integrated natural disaster information system of the Qing Dynasty, The Social History Research Journal, 29–46, 2020.
Jing-Jin-Ji (China)	1832 drought event	Chronicle & Compilation	Tan, X.: Memorials archives on drought of Qing dynasty, China Book Press, Beijing, 2013.
Jing-Jin-Ji (China)	1832 drought event	Chronicle & Compilation	Zhang, D.: A compendium of Chinese meteorological records of the last 3,000 years, 2nd ed., Jiangsu Education Publishing House, Nanjing, 2013.
Jing-Jin-Ji (China)	1921 drought event	Chronicle & Compilation	Li, W.: The continuation of disaster annals in recent China 1919–1949, Hunan Education Publishing House, Changsha, 1993.
Jing-Jin-Ji (China)	1921 drought event	Chronicle & Compilation	Cai, Q.: The China disaster annals: Republic of China volume, China Social Sciences Publishing House, Beijing, 2018.
Jing-Jin-Ji (China)	1921 drought event, 1997 drought event	Chronicle & Compilation	Ding, Y.: The China meteorological disaster dictionary: Comprehensive volume, China Meteorological Press, Beijing, 2008.
Jing-Jin-Ji (China)	1921 drought event, 1997 drought event	Chronicle & Compilation	Xie, P.: The China meteorological disaster dictionary: Beijing volume, China Meteorological Press, Beijing, 2005.
Jing-Jin-Ji (China)	1921 drought event, 1997 drought event	Chronicle & Compilation	Wang, Z.: The China meteorological disaster dictionary: Tianjin volume, China Meteorological Press, Beijing, 2008.
Jing-Jin-Ji (China)	1921 drought event, 1997 drought event	Chronicle & Compilation	Zang, J.: The China meteorological disaster dictionary: Hebei volume, China Meteorological Press, Beijing, 2007.
Jing-Jin-Ji (China)	1997 drought event	Newspaper	People's Daily. https://data.people.com.cn/rmrb/ (last access: 30 September 2023).	Edition from: 03/01/1997; 13/02/1997; 01/03/1997; 28/03/1997; 02/04/1997; 15/04/1997; 25/04/1997; 04/05/1997; 06/05/1997; 08/05/1997; 14/06/1997; 27/06/1997; 09/07/1997; 09/07/1997; 10/07/1997; 14/07/1997; 15/07/1997; 16/07/1997; 17/07/1997; 18/07/1997; 20/07/1997; 20/07/1997; 22/07/1997; 23/07/1997; 29/07/1997; 05/08/1997; 07/08/1997; 10/08/1997; 02/09/1997; 04/09/1997; 08/09/1997; 22/09/1997; 2…
Jing-Jin-Ji (China)	1997 drought event	Newspaper	China Meteorological News. http://epaper.zgqxb.com.cn/ (last access: 27 November 2024)	Edition from: 17/06/2002
Jing-Jin-Ji (China)	1997 drought event	Yearbook	Zhang, X.: Almanac of China Water Resources 1998, China Water & Power Press, Beijing, 1998.
Jing-Jin-Ji (China)	1997 drought event	Yearbook	Zhang, X.: Almanac of China Water Resources 1999, China Water & Power Press, Beijing, 1999.
Jing-Jin-Ji (China)	1997 drought event	Yearbook	Wang, G.: Almanac of China Water Resources 2000, China Water & Power Press, Beijing, 2000.
Jing-Jin-Ji (China)	1997 drought event	Yearbook	Wang, G.: Almanac of China Water Resources 2001, China Water & Power Press, Beijing, 2001.
Jing-Jin-Ji (China)	1997 drought event	Yearbook	Wang, G.: Almanac of China Water Resources 2002, China Water & Power Press, Beijing, 2002.
Jing-Jin-Ji (China)	1997 drought event	Yearbook	Zhu, E.: Almanac of China Water Resources 2003, China Water & Power Press, Beijing, 2003.
Jing-Jin-Ji (China)	1921 drought event	Report	Lambuth, W. R.: China famine conditions which I have just seen, American Committee for China Famine Fund, New York, 1921.
Jing-Jin-Ji (China)	1997 drought event	Report	Ministry of Ecology and Environment: Report on the State of the Environment in China 1997, 1998.
Jing-Jin-Ji (China)	1997 drought event	Report	Ministry of Ecology and Environment: Report on the State of the Environment in China 1998, 1999.
Jing-Jin-Ji (China)	1997 drought event	Report	Ministry of Ecology and Environment: Report on the State of the Environment in China 1999, 2000.
Jing-Jin-Ji (China)	1997 drought event	Report	Ministry of Ecology and Environment: Report on the State of the Environment in China 2000, 2001.
Jing-Jin-Ji (China)	1997 drought event	Report	Ministry of Ecology and Environment: Report on the State of the Environment in China 2001, 2002.
Jing-Jin-Ji (China)	1997 drought event	Report	Ministry of Ecology and Environment: Report on the State of the Environment in China 2002, 2003.
Jing-Jin-Ji (China)	1921 drought event	Secondary research by historians	Hershatter, G.: The workers of Tianjin 1900-1949, Stanford University Press, Stanford, 1986.
Jing-Jin-Ji (China)	1921 drought event	Secondary research by historians	Li, W., Cheng, X., Liu, Y., and Xia, M.: The tenth greatest disasters in early modern China, Shanghai People’s Press, Shanghai, 1994.
Jing-Jin-Ji (China)	1921 drought event	Secondary research by historians	Xia, M.: Natural disasters and rural society in the Republic of China, Zhonghua Book Company, Beijing, 2000.
Jing-Jin-Ji (China)	1921 drought event	Secondary research by historians	Li, L. M.: Fighting famine in North China: State, market, and environmental decline, 1690s~1990s, Standford University Press, Stanford, 2007.
Jing-Jin-Ji (China)	1921 drought event	Secondary research by historians	Chen, Y.: The China International Famine Relief Commission and the Rural Cooperative Movement in China, 1923–1934, The Chinese Historical Review, 13, 105–134, https://doi.org/10.1080/1547402X.2006.11827234, 2006.
Jing-Jin-Ji (China)	1921 drought event	Secondary research by historians	Fuller, P.: North China Famine Revisited: Unsung Native Relief in the Warlord Era, 1920–1921, Mod. Asian Stud., 47, 820–850, https://doi.org/10.1017/S0026749X12000534, 2013.
