# Supplementary material for: Stable yet dynamic: a cross-era comparative case study of drought impacts and social responses in Germany and Jing-Jin-Ji Region (China)
Source: Copernicus journal article supplement (doi:10.5194/cp-21-1481-2025), 2025-08-29
Supplement: Supplementary file 3 [file Supplement S3_drought effects and impacts.xlsx]

## Sheet: Supplement S3
Study area	Event	Year	Season	Impact category	Sub-category	Effects and impacts
Germany	1834 drought event	1833	Autumn	Meteorological	Precipitation	deficit
Germany	1834 drought event	1833/1834	Winter	NA	NA	NA
Germany	1834 drought event	1834	Spring	Meteorological	Precipitation	deficit
Germany	1834 drought event	1834	Summer	Meteorological	Precipitation	severe deficit
Germany	1834 drought event	1834	Summer	Meteorological	Temperature	heatwave
Germany	1834 drought event	1834	Summer	Ecological	Vegetation	abnormal phenological period (early harvest), poor plant growth (clover fields), insect plague (field mice, grasshoppers), wildfire
Germany	1834 drought event	1834	Summer	Agricultural	Crop	harvest failure
Germany	1834 drought event	1834	Summer	Agricultural	Livestock	lack of fodder
Germany	1834 drought event	1834	Summer	Hydrological	River	low water level (streams)
Germany	1834 drought event	1834	Summer	Hydrological	Lake & Reservoir	shrinking water body (Lake Constance)
Germany	1834 drought event	1834	Summer	Hydrological	Groundwater	wells dry up
Germany	1834 drought event	1834	Summer	Socioeconomic	Food security	supply (risk due to limited use of mills)
Germany	1834 drought event	1834	Summer	Socioeconomic	Water security	drinking water, hygiene and sanitation
Germany	1834 drought event	1834	Summer	Socioeconomic	Economy	private property losses (fire disaster), decrease in income (ranchers, sawmills)
Germany	1834 drought event	1834	Summer	Socioeconomic	Social stability	water conflict (between millers and farmers)
Germany	1834 drought event	1834	Autumn	Meteorological	Precipitation	deficit
Germany	1834 drought event	1834	Autumn	Meteorological	Temperature	heatwave
Germany	1834 drought event	1834	Autumn	Ecological	Vegetation	abnormal phenological period (blossom again in September)
Germany	1834 drought event	1834	Autumn	Agricultural	Crop	difficulty in sowing, harvest failure
Germany	1834 drought event	1834	Autumn	Hydrological	River	low water level (larger rivers)
Germany	1834 drought event	1834/1835	Winter	Hydrological	River	low water level (larger rivers)
Germany	1834 drought event	1834/1835	Winter	Socioeconomic	Food security	supply (risk due to limited use of mills)
Germany	1834 drought event	1835	Spring	Hydrological	River	low water level (larger rivers)
Germany	1834 drought event	1835	Spring	Socioeconomic	Food security	supply (risk due to limited use of mills)
Germany	1834 drought event	1835	Summer	Meteorological	Precipitation	severe deficit
Germany	1834 drought event	1835	Summer	Meteorological	Temperature	heatwave
Germany	1834 drought event	1835	Summer	Ecological	Vegetation	decreased vegetation cover (clover fields were barren)
Germany	1834 drought event	1835	Summer	Agricultural	Crop	harvest failure
Germany	1834 drought event	1835	Summer	Hydrological	River	low water level (larger rivers), cease to flow (streams)
Germany	1834 drought event	1835	Summer	Socioeconomic	Food security	supply (risk due to limited use of mills)
Germany	1834 drought event	1835	Autumn	Meteorological	Precipitation	deficit
Germany	1834 drought event	1835	Autumn	Agricultural	Crop	difficulty in sowing
Germany	1834 drought event	1835	Autumn	Hydrological	River	low water level (larger rivers)
Germany	1834 drought event	1835	Autumn	Socioeconomic	Food security	supply (risk due to limited use of mills)
Germany	1834 drought event	1835/1836	Winter	NA	NA	NA
Germany	1834 drought event	1836	Spring	NA	NA	NA
Germany	1834 drought event	1836	Summer	Meteorological	Precipitation	deficit
Germany	1834 drought event	1836	Summer	Hydrological	River	low water level (larger rivers), cease to flow (streams)
Germany	1921 drought event	1920	Autumn	Meteorological	Precipitation	severe deficit
Germany	1921 drought event	1920	Autumn	Hydrological	River	low water level (Rhine)
Germany	1921 drought event	1920/1921	Winter	Meteorological	Precipitation	deficit
Germany	1921 drought event	1920/1921	Winter	Hydrological	River	low water level (Rhine)
Germany	1921 drought event	1920/1921	Winter	Hydrological	Lake & Reservoir	decreased water stock
Germany	1921 drought event	1920/1921	Winter	Socioeconomic	Economy	obstruction of transport (water-borne transportation: lower efficiency, increase in traffic accidents)
Germany	1921 drought event	1921	Spring	Meteorological	Precipitation	deficit
Germany	1921 drought event	1921	Spring	Ecological	Vegetation	wildfire
Germany	1921 drought event	1921	Spring	Hydrological	River	low water level (Rhine, Elbe, Oder)
Germany	1921 drought event	1921	Spring	Socioeconomic	Economy	obstruction of transport (water-borne transportation: lower efficiency; increase in traffic accidents)
Germany	1921 drought event	1921	Summer	Meteorological	Precipitation	severe deficit
Germany	1921 drought event	1921	Summer	Meteorological	Temperature	heatwave
Germany	1921 drought event	1921	Summer	Ecological	Vegetation	abnormal phenological period (grains ripen very quickly), poor plant growth (leaves hung limply, meadows turned yellow), insect plague (field mice), wildfire
Germany	1921 drought event	1921	Summer	Ecological	Freshwater system	increased water temperature (Lake Constance), deteriorated water quality (Elbe, Oder)
Germany	1921 drought event	1921	Summer	Agricultural	Soil moisture	cracks in land
Germany	1921 drought event	1921	Summer	Agricultural	Crop	growth affected, harvest failure
Germany	1921 drought event	1921	Summer	Agricultural	Livestock	lack of fodder (low yield, high price), lack of bedding material (straw)
Germany	1921 drought event	1921	Summer	Hydrological	River	low water level (Rhine, Weser-hunger stone, Elbe, Oder)
Germany	1921 drought event	1921	Summer	Hydrological	Lake & Reservoir	shrinking water body (Lake Constance), decreased water stock
Germany	1921 drought event	1921	Summer	Hydrological	Groundwater	dropped water level (wells dry up)
Germany	1921 drought event	1921	Summer	Socioeconomic	Food security	affordable (emerging food crisis due to increasing price, esp. bread), milk supply (shelf life reduced due to heat)
Germany	1921 drought event	1921	Summer	Socioeconomic	Water security	drinking water (difficulty in supply), lack of water for hygiene and sanitation
Germany	1921 drought event	1921	Summer	Socioeconomic	Energy	electricity generation (hydropower severely limited)
Germany	1921 drought event	1921	Summer	Socioeconomic	Health	poorer health condition of the poor in cities, illness (heatstroke, poisoning after eating grapes that had pest remedies residue due to little rainfall), death (increased infant mortality)
Germany	1921 drought event	1921	Summer	Socioeconomic	Economy	obstruction of transport (water-borne transportation: lower efficiency, increase in traffic accidents, strictly restricted or even stopped), private property loss (fire disaster)
Germany	1921 drought event	1921	Summer	Socioeconomic	Social stability	crime (profiteering: speculative purchases by potato acquirers)
Germany	1921 drought event	1921	Autumn	Meteorological	Precipitation	deficit
Germany	1921 drought event	1921	Autumn	Meteorological	Temperature	heatwave
Germany	1921 drought event	1921	Autumn	Ecological	Freshwater system	deteriorated water quality (Rhine, Weser, Elbe, Oder)
Germany	1921 drought event	1921	Autumn	Hydrological	River	low water level (Rhine, Weser, Elbe, Oder)
Germany	1921 drought event	1921	Autumn	Socioeconomic	Economy	obstruction of transport (water-borne transportation: lower efficiency, increase in traffic accidents, strictly restricted or even stopped)
Germany	2018 drought event	2017/2018	Winter	Meteorological	Precipitation	deficit
Germany	2018 drought event	2018	Spring	Meteorological	Precipitation	severe deficit
Germany	2018 drought event	2018	Spring	Meteorological	Temperature	heatwave
Germany	2018 drought event	2018	Spring	Ecological	Vegetation	abnormal phenological period (early developmental stage), insect plague (apple ermine moth)
Germany	2018 drought event	2018	Spring	Agricultural	Soil moisture	insufficient moisture
Germany	2018 drought event	2018	Spring	Agricultural	Crop	harvest failure
Germany	2018 drought event	2018	Spring	Socioeconomic	Water security	drinking water (supply: insufficient pipeline pressure in remote residential areas)
Germany	2018 drought event	2018	Spring	Socioeconomic	Economy	infrastructure damage (heat damage to highways)
Germany	2018 drought event	2018	Summer	Meteorological	Precipitation	severe deficit
Germany	2018 drought event	2018	Summer	Meteorological	Temperature	heatwave
Germany	2018 drought event	2018	Summer	Ecological	Vegetation	abnormal phenological period (early developmental stage, early defoliation), poor plant growth (slow growth, withered), plant death, insect plague, wildfire
Germany	2018 drought event	2018	Summer	Ecological	Freshwater system	increased water temperature, deteriorated water quality (algae bloom), fish death
Germany	2018 drought event	2018	Summer	Ecological	Soil	dust storm
Germany	2018 drought event	2018	Summer	Agricultural	Soil moisture	insufficient moisture
Germany	2018 drought event	2018	Summer	Agricultural	Crop	difficulty in sowing, growth affected, poor quality, harvest failure
Germany	2018 drought event	2018	Summer	Agricultural	Livestock	lack of fodder (insufficient supply, rising price), decrease in production
Germany	2018 drought event	2018	Summer	Hydrological	River	low water level (Rhine, Weser, Elbe), cease to flow (streams)
Germany	2018 drought event	2018	Summer	Hydrological	Lake & Reservoir	decreased water stock
Germany	2018 drought event	2018	Summer	Hydrological	Groundwater	wells dry up (private drinking-water wells)
Germany	2018 drought event	2018	Summer	Socioeconomic	Food security	increase in price (milk products, grain, vegetable, potato)
Germany	2018 drought event	2018	Summer	Socioeconomic	Water security	drinking water (imbalance between supply and demand, poor quality)
Germany	2018 drought event	2018	Summer	Socioeconomic	Energy	electricity (decrease in generation, increase in price)
Germany	2018 drought event	2018	Summer	Socioeconomic	Health	fire-induced injury,illness (sunburn, heat stress such as cardiac arrhythmias, dizziness or headaches, and heatstroke), death (heat-induced)
Germany	2018 drought event	2018	Summer	Socioeconomic	Economy	water-borne transportation (lower efficiency, obstructed or even temporarily stop), private property losses (fire disaster), infrastructure damage (highway, railway system, airport), limited economic activity (chemical company,factory), decreased income (farmer/farming company, rancher, forest enterprise, fashion retailer), increased expenditure (rancher, company)
Germany	2018 drought event	2018	Summer	Socioeconomic	Social stability	water conflict between fishermen and hydropower plant factories
Germany	2018 drought event	2018	Autumn	Meteorological	Precipitation	severe deficit
Germany	2018 drought event	2018	Autumn	Meteorological	Temperature	heatwave
Germany	2018 drought event	2018	Autumn	Ecological	Vegetation	abnormal phenological period (early developmental stage), poor plant growth (withered), plant death, insect plague, wildfire
Germany	2018 drought event	2018	Autumn	Ecological	Freshwater system	deteriorated water quality (algae bloom), fish death
Germany	2018 drought event	2018	Autumn	Agricultural	Soil moisture	insufficient moisture
Germany	2018 drought event	2018	Autumn	Agricultural	Crop	difficulty in sowing, growth affected, poor quality, harvest failure
Germany	2018 drought event	2018	Autumn	Agricultural	Livestock	lack of fodder (insufficient supply, rising price), decrease in production
Germany	2018 drought event	2018	Autumn	Hydrological	River	low water level (Rhine, Weser, Elbe, Oder), reduced flow, cease to flow (streams)
Germany	2018 drought event	2018	Autumn	Hydrological	Lake & Reservoir	shrinking water body, dry up
Germany	2018 drought event	2018	Autumn	Hydrological	Groundwater	dropped water level, wells dry up (private drinking-water wells)
Germany	2018 drought event	2018	Autumn	Socioeconomic	Food security	increase in price (vegetable, potato)
Germany	2018 drought event	2018	Autumn	Socioeconomic	Water security	other usage (public water supply, e.g., very tense in Berlin), drinking water (imbalance between supply and demand, poor quality)
Germany	2018 drought event	2018	Autumn	Socioeconomic	Energy	fuel (supply bottlenecks through inland navigation, rising price)
Germany	2018 drought event	2018	Autumn	Socioeconomic	Economy	water-borne transportation (lower efficiency, obstructed or even temporarily stop), decreased income (farmer, rancher, forest enterprise, port, chemical company), increased expenditure (rancher, company), limited economic activity (food processing industry)
Germany	2018 drought event	2018/2019	Winter	Meteorological	Precipitation	deficit
Germany	2018 drought event	2018/2019	Winter	Ecological	Vegetation	abnormal phenological period (early developmental stage)
Germany	2018 drought event	2018/2019	Winter	Agricultural	Soil moisture	insufficient moisture
Germany	2018 drought event	2018/2019	Winter	Hydrological	River	low water level (Oder)
Germany	2018 drought event	2018/2019	Winter	Socioeconomic	Food security	increase in price (potato, bread, meat)
Germany	2018 drought event	2019	Spring	Meteorological	Precipitation	deficit
Germany	2018 drought event	2019	Spring	Agricultural	Soil moisture	insufficient moisture
Germany	2018 drought event	2019	Spring	Agricultural	Crop	growth affected
Germany	2018 drought event	2019	Spring	Hydrological	Groundwater	insufficiently derfilled aquifer
Germany	2018 drought event	2019	Spring	Socioeconomic	Food security	increase in price (potato, bread, meat)
Germany	2018 drought event	2019	Summer	Meteorological	Precipitation	deficit
Germany	2018 drought event	2019	Summer	Meteorological	Temperature	heatwave
Germany	2018 drought event	2019	Summer	Ecological	Vegetation	abnormal phenological period (early developmental stage), poor plant growth (grassland), insect plague, wildfire
Germany	2018 drought event	2019	Summer	Agricultural	Soil moisture	insufficient moisture
Germany	2018 drought event	2019	Summer	Agricultural	Crop	growth affected, poor quality, harvest failure
Germany	2018 drought event	2019	Summer	Agricultural	Livestock	lack of fodder
Germany	2018 drought event	2019	Summer	Hydrological	River	low water level (Weser, Elbe, Oder)
Germany	2018 drought event	2019	Summer	Hydrological	Lake & Reservoir	decreased water stock
Germany	2018 drought event	2019	Summer	Hydrological	Groundwater	wells dry up (private drinking-water wells)
Germany	2018 drought event	2019	Summer	Socioeconomic	Water security	water supply (e.g., imbalance between water supply and demand)
Germany	2018 drought event	2019	Autumn	Agricultural	Soil moisture	insufficient moisture
Germany	2018 drought event	2019	Autumn	Agricultural	Crop	difficulty in sowing
Germany	2018 drought event	2019	Autumn	Hydrological	River	low water level (Weser, Elbe, Oder)
Germany	2018 drought event	2019	Autumn	Hydrological	Groundwater	dropped water level
Germany	2018 drought event	2019/2020	Winter	Meteorological	Precipitation	deficit
Germany	2018 drought event	2019/2020	Winter	Ecological	Vegetation	poor plant growth
Germany	2018 drought event	2019/2020	Winter	Agricultural	Soil moisture	insufficient moisture
Germany	2018 drought event	2020	Spring	Meteorological	Precipitation	severe deficit
Germany	2018 drought event	2020	Spring	Ecological	Vegetation	poor plant growth
Germany	2018 drought event	2020	Spring	Agricultural	Soil moisture	insufficient moisture
Germany	2018 drought event	2020	Spring	Agricultural	Crop	growth affected
Germany	2018 drought event	2020	Spring	Agricultural	Livestock	lack of fodder
Germany	2018 drought event	2020	Spring	Hydrological	Groundwater	dropped water level
Germany	2018 drought event	2020	Summer	Meteorological	Precipitation	deficit
Germany	2018 drought event	2020	Summer	Meteorological	Temperature	heatwave
Germany	2018 drought event	2020	Summer	Ecological	Vegetation	abnormal phenological period (early discoloration and defoliation), poor plant growth, insect plague, wildfire
Germany	2018 drought event	2020	Summer	Agricultural	Soil moisture	insufficient moisture
Germany	2018 drought event	2020	Summer	Agricultural	Crop	growth affected
Germany	2018 drought event	2020	Summer	Agricultural	Livestock	lack of fodder
Germany	2018 drought event	2020	Summer	Hydrological	River	low water level (Rhine, Weser, Elbe)
Germany	2018 drought event	2020	Summer	Hydrological	Lake & Reservoir	decreased water stock
Germany	2018 drought event	2020	Summer	Hydrological	Groundwater	wells dry up (private drinking-water wells)
Germany	2018 drought event	2020	Summer	Socioeconomic	Water security	drinking water (supply, rising price), hygiene and sanitation
Germany	2018 drought event	2020	Autumn	Meteorological	Precipitation	deficit
Germany	2018 drought event	2020	Autumn	Ecological	Vegetation	abnormal phenological period (early discoloration and defoliation), poor plant growth, insect plague
Germany	2018 drought event	2020	Autumn	Agricultural	Soil moisture	insufficient moisture
Germany	2018 drought event	2020	Autumn	Agricultural	Crop	growth affected, harvest failure
Germany	2018 drought event	2020	Autumn	Hydrological	River	low water level (Weser, Elbe)
Germany	2018 drought event	2020	Autumn	Hydrological	Groundwater	dropped water level
Germany	2018 drought event	2020/2021	Winter	Meteorological	Precipitation	deficit
Germany	2018 drought event	2020/2021	Winter	Ecological	Vegetation	insect plague
Germany	2018 drought event	2021	Spring	Meteorological	Precipitation	deficit
Germany	2018 drought event	2021	Spring	Agricultural	Soil moisture	insufficient moisture
Jing-Jin-Ji (China)	1832 drought event	1831	Spring	Meteorological	Precipitation	deficit
Jing-Jin-Ji (China)	1832 drought event	1831	Summer	Meteorological	Precipitation	severe deficit
Jing-Jin-Ji (China)	1832 drought event	1831	Summer	Meteorological	Temperature	heatwave
Jing-Jin-Ji (China)	1832 drought event	1831	Summer	Ecological	Vegetation	insect plague (locust)
Jing-Jin-Ji (China)	1832 drought event	1831	Summer	Socioeconomic	Health	epidemic
Jing-Jin-Ji (China)	1832 drought event	1831	Autumn	Meteorological	Precipitation	deficit
Jing-Jin-Ji (China)	1832 drought event	1831	Autumn	Agricultural	Crop	harvest failure
Jing-Jin-Ji (China)	1832 drought event	1831/1832	Winter	NA	NA	NA
Jing-Jin-Ji (China)	1832 drought event	1832	Spring	Meteorological	Precipitation	severe deficit
Jing-Jin-Ji (China)	1832 drought event	1832	Spring	Socioeconomic	Food security	famine
Jing-Jin-Ji (China)	1832 drought event	1832	Spring	Socioeconomic	Social stability	conflict (unrest among hungry people)
Jing-Jin-Ji (China)	1832 drought event	1832	Summer	Meteorological	Precipitation	severe deficit
Jing-Jin-Ji (China)	1832 drought event	1832	Summer	Meteorological	Temperature	heatwave
Jing-Jin-Ji (China)	1832 drought event	1832	Summer	Ecological	Vegetation	decreased vegetation cover (barren land), insect plague (locust)
Jing-Jin-Ji (China)	1832 drought event	1832	Summer	Agricultural	Crop	difficulty in sowing, growth affected (crop withered), harvest failure
Jing-Jin-Ji (China)	1832 drought event	1832	Summer	Hydrological	River	cease to flow
Jing-Jin-Ji (China)	1832 drought event	1832	Summer	Socioeconomic	Food security	supply (porridge for relief was spoiled due to the heat), affordable (high food price), famine
Jing-Jin-Ji (China)	1832 drought event	1832	Summer	Socioeconomic	Health	epidemic, death (starvation)
Jing-Jin-Ji (China)	1832 drought event	1832	Summer	Socioeconomic	Social stability	displacement and migration, crimes (mobbing, robbery, extortion, profiteering)
Jing-Jin-Ji (China)	1832 drought event	1832	Autumn	Ecological	Vegetation	insect plague (locust)
Jing-Jin-Ji (China)	1832 drought event	1832	Autumn	Agricultural	Crop	harvest failure
Jing-Jin-Ji (China)	1832 drought event	1832	Autumn	Socioeconomic	Food security	famine
Jing-Jin-Ji (China)	1832 drought event	1832	Autumn	Socioeconomic	Health	epidemic
Jing-Jin-Ji (China)	1832 drought event	1832/1833	Winter	Socioeconomic	Food security	affordable (high food price), famine
Jing-Jin-Ji (China)	1832 drought event	1832/1833	Winter	Socioeconomic	Health	epidemic, death (starvation)
Jing-Jin-Ji (China)	1832 drought event	1832/1833	Winter	Socioeconomic	Social stability	displacement and migration, crimes (robbery, profiteering)
Jing-Jin-Ji (China)	1832 drought event	1833	Spring	Meteorological	Precipitation	deficit
Jing-Jin-Ji (China)	1832 drought event	1833	Spring	Agricultural	Crop	difficulty in sowing
Jing-Jin-Ji (China)	1832 drought event	1833	Spring	Socioeconomic	Food security	affordable (high food price), famine
Jing-Jin-Ji (China)	1832 drought event	1833	Spring	Socioeconomic	Health	epidemic, death (starvation)
Jing-Jin-Ji (China)	1832 drought event	1833	Spring	Socioeconomic	Social stability	displacement and migration, crimes (robbery, profiteering)
Jing-Jin-Ji (China)	1920 drought event	1919	Autumn	Meteorological	Precipitation	deficit
Jing-Jin-Ji (China)	1920 drought event	1919/1920	Winter	Meteorological	Precipitation	deficit
Jing-Jin-Ji (China)	1920 drought event	1920	Spring	Meteorological	Precipitation	severe deficit
Jing-Jin-Ji (China)	1920 drought event	1920	Spring	Agricultural	Crop	difficulty in sowing
Jing-Jin-Ji (China)	1920 drought event	1920	Summer	Meteorological	Precipitation	severe deficit
Jing-Jin-Ji (China)	1920 drought event	1920	Summer	Meteorological	Temperature	heatwave
Jing-Jin-Ji (China)	1920 drought event	1920	Summer	Ecological	Vegetation	decreased vegetation cover (barren land), insect plague (locust)
Jing-Jin-Ji (China)	1920 drought event	1920	Summer	Agricultural	Crop	difficulty in sowing, growth affected (crop withered), harvest failure
Jing-Jin-Ji (China)	1920 drought event	1920	Summer	Hydrological	River	cease to flow
Jing-Jin-Ji (China)	1920 drought event	1920	Summer	Hydrological	Lake & Reservoir	dry up (pond)
Jing-Jin-Ji (China)	1920 drought event	1920	Summer	Socioeconomic	Food security	affordable (high food price), famine
Jing-Jin-Ji (China)	1920 drought event	1920	Summer	Socioeconomic	Health	epidemic (esp. along the railways)
Jing-Jin-Ji (China)	1920 drought event	1920	Summer	Socioeconomic	Social stability	displacement and migration
Jing-Jin-Ji (China)	1920 drought event	1920	Autumn	Meteorological	Precipitation	severe deficit
Jing-Jin-Ji (China)	1920 drought event	1920	Autumn	Ecological	Vegetation	decreased vegetation cover (barren land), insect plague (locust)
Jing-Jin-Ji (China)	1920 drought event	1920	Autumn	Agricultural	Crop	difficulty in sowing, growth affected (crop withered), poor quality, harvest failure
Jing-Jin-Ji (China)	1920 drought event	1920	Autumn	Hydrological	River	cease to flow
Jing-Jin-Ji (China)	1920 drought event	1920	Autumn	Hydrological	Lake & Reservoir	dry up (pond)
Jing-Jin-Ji (China)	1920 drought event	1920	Autumn	Socioeconomic	Food security	affordable (high food price), famine
Jing-Jin-Ji (China)	1920 drought event	1920	Autumn	Socioeconomic	Health	mental health (suicide)
Jing-Jin-Ji (China)	1920 drought event	1920	Autumn	Socioeconomic	Social stability	displacement and migration, crime (robbery), ethical collapse (sell/abandon family members, esp. female and kids)
Jing-Jin-Ji (China)	1920 drought event	1920/1921	Winter	Socioeconomic	Food security	famine
Jing-Jin-Ji (China)	1920 drought event	1920/1921	Winter	Socioeconomic	Health	malnutrition, epidemic, death (starvation, freeze to death)
Jing-Jin-Ji (China)	1920 drought event	1920/1921	Winter	Socioeconomic	Energy	fuel (lack of straw for cooking and heating)
Jing-Jin-Ji (China)	1920 drought event	1920/1921	Winter	Socioeconomic	Social stability	displacement and migration, crime (robbery), ethical collapse (sell/abandon family members, esp. female and kids)
Jing-Jin-Ji (China)	1920 drought event	1921	Spring	Meteorological	Precipitation	deficit
Jing-Jin-Ji (China)	1920 drought event	1921	Spring	Ecological	Vegetation	wildfire
Jing-Jin-Ji (China)	1920 drought event	1921	Spring	Ecological	Soil	dust storm
Jing-Jin-Ji (China)	1920 drought event	1921	Spring	Agricultural	Crop	difficulty in sowing
Jing-Jin-Ji (China)	1920 drought event	1921	Spring	Socioeconomic	Health	epidemic
Jing-Jin-Ji (China)	1997 drought event	1996/1997	Winter	Meteorological	Precipitation	deficit
Jing-Jin-Ji (China)	1997 drought event	1996/1997	Winter	Agricultural	Soil moisture	insufficient moisture
Jing-Jin-Ji (China)	1997 drought event	1997	Spring	Meteorological	Precipitation	severe deficit
Jing-Jin-Ji (China)	1997 drought event	1997	Spring	Meteorological	Temperature	heatwave
Jing-Jin-Ji (China)	1997 drought event	1997	Spring	Ecological	Vegetation	abnormal phenological period (early developmental stage)
Jing-Jin-Ji (China)	1997 drought event	1997	Spring	Agricultural	Soil moisture	insufficient moisture
Jing-Jin-Ji (China)	1997 drought event	1997	Spring	Agricultural	Crop	difficulty in sowing
Jing-Jin-Ji (China)	1997 drought event	1997	Summer	Meteorological	Precipitation	severe deficit
Jing-Jin-Ji (China)	1997 drought event	1997	Summer	Meteorological	Temperature	heatwave
Jing-Jin-Ji (China)	1997 drought event	1997	Summer	Ecological	Vegetation	insect plague (locust)
Jing-Jin-Ji (China)	1997 drought event	1997	Summer	Agricultural	Soil moisture	insufficient moisture
Jing-Jin-Ji (China)	1997 drought event	1997	Summer	Agricultural	Crop	difficulty in sowing, growth affected
Jing-Jin-Ji (China)	1997 drought event	1997	Summer	Hydrological	River	cease to flow
Jing-Jin-Ji (China)	1997 drought event	1997	Summer	Hydrological	Lake & Reservoir	decreased water stock
Jing-Jin-Ji (China)	1997 drought event	1997	Summer	Hydrological	Groundwater	dropped water level
Jing-Jin-Ji (China)	1997 drought event	1997	Summer	Socioeconomic	Water security	drinking water (difficult supply in rural areas), other usage (urban water scarcity due to imbalance between supply and demand)
Jing-Jin-Ji (China)	1997 drought event	1997	Summer	Socioeconomic	Energy	electricity (imbalance between supply and demand)
Jing-Jin-Ji (China)	1997 drought event	1997	Summer	Socioeconomic	Health	illness (heat stress such as heatstroke and gastrointestinal diseases, esp. children and the old), death (heat-induced)
Jing-Jin-Ji (China)	1997 drought event	1997	Summer	Socioeconomic	Economy	infrastructure damage (electric power system and water supply system damaged due to overloading), private property losses (fire disaster)
Jing-Jin-Ji (China)	1997 drought event	1997	Autumn	Meteorological	Precipitation	severe deficit
Jing-Jin-Ji (China)	1997 drought event	1997	Autumn	Agricultural	Soil moisture	insufficient moisture
Jing-Jin-Ji (China)	1997 drought event	1997	Autumn	Agricultural	Crop	difficulty in sowing, growth affected (unable to grow), harvest failure
Jing-Jin-Ji (China)	1997 drought event	1997	Autumn	Hydrological	River	cease to flow
Jing-Jin-Ji (China)	1997 drought event	1997	Autumn	Hydrological	Lake & Reservoir	decreased water stock
Jing-Jin-Ji (China)	1997 drought event	1997	Autumn	Hydrological	Groundwater	dropped water level
Jing-Jin-Ji (China)	1997 drought event	1997	Autumn	Socioeconomic	Water security	drinking water (difficult supply in rural areas), other usage (urban water scarcity due to imbalance between supply and demand)
Jing-Jin-Ji (China)	1997 drought event	1997/1998	Winter	Meteorological	Precipitation	deficit
Jing-Jin-Ji (China)	1997 drought event	1997/1998	Winter	Agricultural	Soil moisture	insufficient moisture
Jing-Jin-Ji (China)	1997 drought event	1997/1998	Winter	Hydrological	Lake & Reservoir	decreased water stock
Jing-Jin-Ji (China)	1997 drought event	1998	Spring	Meteorological	Precipitation	deficit
Jing-Jin-Ji (China)	1997 drought event	1998	Spring	Agricultural	Soil moisture	insufficient moisture
Jing-Jin-Ji (China)	1997 drought event	1998	Spring	Hydrological	Lake & Reservoir	decreased water stock
Jing-Jin-Ji (China)	1997 drought event	1998	Spring	Socioeconomic	Water security	other usage (insufficient for irrigating)
Jing-Jin-Ji (China)	1997 drought event	1998	Spring	Socioeconomic	Economy	private property losses (fire disaster)
Jing-Jin-Ji (China)	1997 drought event	1998	Summer	Meteorological	Precipitation	deficit
Jing-Jin-Ji (China)	1997 drought event	1998	Summer	Meteorological	Temperature	heatwave
Jing-Jin-Ji (China)	1997 drought event	1998	Summer	Ecological	Vegetation	abnormal phenological period (early harvest)
Jing-Jin-Ji (China)	1997 drought event	1998	Summer	Agricultural	Crop	growth affected (withered)
Jing-Jin-Ji (China)	1997 drought event	1998	Summer	Socioeconomic	Water security	drinking water (difficult supply in rural areas)
Jing-Jin-Ji (China)	1997 drought event	1998	Summer	Socioeconomic	Energy	electricity (imbalance between supply and demand)
Jing-Jin-Ji (China)	1997 drought event	1998	Summer	Socioeconomic	Economy	infrastructure damage (electric power system damaged due to overloading)
Jing-Jin-Ji (China)	1997 drought event	1998	Summer	Socioeconomic	Social stability	water conflicts between inhabitants living on the boundary of Hebei and Henan Provinces
Jing-Jin-Ji (China)	1997 drought event	1998	Autumn	Meteorological	Precipitation	severe deficit
Jing-Jin-Ji (China)	1997 drought event	1998	Autumn	Meteorological	Temperature	heatwave
Jing-Jin-Ji (China)	1997 drought event	1998	Autumn	Agricultural	Soil moisture	insufficient moisture
Jing-Jin-Ji (China)	1997 drought event	1998	Autumn	Agricultural	Crop	growth affected (withered)
Jing-Jin-Ji (China)	1997 drought event	1998	Autumn	Socioeconomic	Water security	drinking water (difficult supply in rural areas)
Jing-Jin-Ji (China)	1997 drought event	1998/1999	Winter	Meteorological	Precipitation	severe deficit
Jing-Jin-Ji (China)	1997 drought event	1998/1999	Winter	Agricultural	Soil moisture	insufficient moisture
Jing-Jin-Ji (China)	1997 drought event	1998/1999	Winter	Agricultural	Crop	growth affected (withered)
Jing-Jin-Ji (China)	1997 drought event	1998/1999	Winter	Socioeconomic	Water security	drinking water (difficult supply in rural areas)
Jing-Jin-Ji (China)	1997 drought event	1998/1999	Winter	Socioeconomic	Social stability	water conflicts (inhabitants living on the boundary of Hebei and Henan Provinces)
Jing-Jin-Ji (China)	1997 drought event	1999	Spring	Meteorological	Precipitation	severe deficit
Jing-Jin-Ji (China)	1997 drought event	1999	Spring	Ecological	Vegetation	abnormal phenological period (advanced growth of the winter wheat)
Jing-Jin-Ji (China)	1997 drought event	1999	Spring	Agricultural	Crop	difficulty in sowing, growth affected
Jing-Jin-Ji (China)	1997 drought event	1999	Spring	Hydrological	Groundwater	dropped water level
Jing-Jin-Ji (China)	1997 drought event	1999	Spring	Socioeconomic	Water security	drinking water (difficult supply in rural areas), other usage (urban water scarcity due to imbalance between supply and demand)
Jing-Jin-Ji (China)	1997 drought event	1999	Summer	Meteorological	Precipitation	severe deficit
Jing-Jin-Ji (China)	1997 drought event	1999	Summer	Meteorological	Temperature	heatwave
Jing-Jin-Ji (China)	1997 drought event	1999	Summer	Agricultural	Soil moisture	insufficient moisture
Jing-Jin-Ji (China)	1997 drought event	1999	Summer	Agricultural	Crop	growth affected
Jing-Jin-Ji (China)	1997 drought event	1999	Summer	Socioeconomic	Water security	drinking water (difficult supply in rural areas), other usage (urban water scarcity due to imbalance between supply and demand)
Jing-Jin-Ji (China)	1997 drought event	1999	Summer	Socioeconomic	Energy	electricity (imbalance between supply and demand)
Jing-Jin-Ji (China)	1997 drought event	1999	Summer	Socioeconomic	Health	illness (heat stress such as heatstroke, cardiovascular diseases, and gastrointestinal diseases, esp. children and the old)
Jing-Jin-Ji (China)	1997 drought event	1999	Autumn	Meteorological	Precipitation	deficit
Jing-Jin-Ji (China)	1997 drought event	1999	Autumn	Agricultural	Crop	harvest failure
Jing-Jin-Ji (China)	1997 drought event	1999	Autumn	Hydrological	River	reduced flow
Jing-Jin-Ji (China)	1997 drought event	1999	Autumn	Hydrological	Lake & Reservoir	decreased water stock
Jing-Jin-Ji (China)	1997 drought event	1999	Autumn	Hydrological	Groundwater	dropped water level
Jing-Jin-Ji (China)	1997 drought event	1999	Autumn	Socioeconomic	Economy	decreased income
Jing-Jin-Ji (China)	1997 drought event	1999/2000	Winter	NA	NA	NA
Jing-Jin-Ji (China)	1997 drought event	2000	Spring	Meteorological	Precipitation	severe deficit
Jing-Jin-Ji (China)	1997 drought event	2000	Spring	Meteorological	Temperature	heatwave
Jing-Jin-Ji (China)	1997 drought event	2000	Spring	Ecological	Soil	dust storm
Jing-Jin-Ji (China)	1997 drought event	2000	Spring	Agricultural	Soil moisture	insufficient moisture
Jing-Jin-Ji (China)	1997 drought event	2000	Spring	Agricultural	Crop	difficulty in sowing
Jing-Jin-Ji (China)	1997 drought event	2000	Spring	Hydrological	River	low water level
Jing-Jin-Ji (China)	1997 drought event	2000	Spring	Socioeconomic	Water security	drinking water (difficult supply in rural areas), other usage (urban water scarcity due to imbalance between supply and demand)
Jing-Jin-Ji (China)	1997 drought event	2000	Spring	Socioeconomic	Economy	water-borne transportation obstructed
Jing-Jin-Ji (China)	1997 drought event	2000	Summer	Meteorological	Precipitation	severe deficit
Jing-Jin-Ji (China)	1997 drought event	2000	Summer	Meteorological	Temperature	heatwave
Jing-Jin-Ji (China)	1997 drought event	2000	Summer	Ecological	Vegetation	insect plague (locust)
Jing-Jin-Ji (China)	1997 drought event	2000	Summer	Agricultural	Soil moisture	insufficient moisture
Jing-Jin-Ji (China)	1997 drought event	2000	Summer	Agricultural	Crop	harvest failure
Jing-Jin-Ji (China)	1997 drought event	2000	Summer	Hydrological	River	reduced flow
Jing-Jin-Ji (China)	1997 drought event	2000	Summer	Hydrological	Lake & Reservoir	decreased water stock
Jing-Jin-Ji (China)	1997 drought event	2000	Summer	Hydrological	Groundwater	dropped water level
Jing-Jin-Ji (China)	1997 drought event	2000	Summer	Socioeconomic	Water security	drinking water (difficult supply in rural areas), other usage (urban water scarcity due to imbalance between supply and demand)
Jing-Jin-Ji (China)	1997 drought event	2000	Summer	Socioeconomic	Energy	electricity (generation, imbalance between supply and demand)
Jing-Jin-Ji (China)	1997 drought event	2000	Summer	Socioeconomic	Health	illness (heat stress such as heatstroke, cardiovascular diseases, and gastrointestinal diseases)
Jing-Jin-Ji (China)	1997 drought event	2000	Summer	Socioeconomic	Economy	decreased income (car wash business)
Jing-Jin-Ji (China)	1997 drought event	2000	Summer	Socioeconomic	Social stability	water conflicts (in the mountainous areas of Hebei Province)
Jing-Jin-Ji (China)	1997 drought event	2000	Autumn	Agricultural	Crop	harvest failure
Jing-Jin-Ji (China)	1997 drought event	2000	Autumn	Hydrological	Lake & Reservoir	decreased water stock
Jing-Jin-Ji (China)	1997 drought event	2000	Autumn	Hydrological	Groundwater	dropped water level (pumping wells scrapped)
Jing-Jin-Ji (China)	1997 drought event	2000	Autumn	Socioeconomic	Water security	drinking water (difficult supply in rural areas), other usage (urban water scarcity due to imbalance between supply and demand)
Jing-Jin-Ji (China)	1997 drought event	2000	Autumn	Socioeconomic	Economy	decreased income (rural households)
Jing-Jin-Ji (China)	1997 drought event	2000/2001	Winter	Ecological	Soil	dust storm
Jing-Jin-Ji (China)	1997 drought event	2001	Spring	Meteorological	Precipitation	severe deficit
Jing-Jin-Ji (China)	1997 drought event	2001	Spring	Meteorological	Temperature	heatwave
Jing-Jin-Ji (China)	1997 drought event	2001	Spring	Ecological	Vegetation	poor plant growth (grass withered, rangeland damaged)
Jing-Jin-Ji (China)	1997 drought event	2001	Spring	Ecological	Soil	dust storm
Jing-Jin-Ji (China)	1997 drought event	2001	Spring	Agricultural	Crop	difficulty in sowing, growth affected
Jing-Jin-Ji (China)	1997 drought event	2001	Spring	Agricultural	Livestock	lack of fodder, death
Jing-Jin-Ji (China)	1997 drought event	2001	Spring	Hydrological	Lake & Reservoir	dry up
Jing-Jin-Ji (China)	1997 drought event	2001	Spring	Hydrological	Groundwater	dropped water level
Jing-Jin-Ji (China)	1997 drought event	2001	Spring	Socioeconomic	Water security	drinking water (difficult supply in rural areas), other usage (urban water scarcity due to imbalance between supply and demand)
Jing-Jin-Ji (China)	1997 drought event	2001	Spring	Socioeconomic	Energy	electricity (shortage)
Jing-Jin-Ji (China)	1997 drought event	2001	Spring	Socioeconomic	Economy	decreased income (rural households, lack of money for agricultural production)
Jing-Jin-Ji (China)	1997 drought event	2001	Summer	Meteorological	Precipitation	deficit
Jing-Jin-Ji (China)	1997 drought event	2001	Summer	Agricultural	Crop	harvest failure
Jing-Jin-Ji (China)	1997 drought event	2001	Summer	Hydrological	River	reduced flow
Jing-Jin-Ji (China)	1997 drought event	2001	Summer	Hydrological	Lake & Reservoir	decreased water stock
Jing-Jin-Ji (China)	1997 drought event	2001	Summer	Socioeconomic	Food security	supply (insufficient in some rural areas)
Jing-Jin-Ji (China)	1997 drought event	2001	Summer	Socioeconomic	Water security	rural drinking water (difficulty in supply), urban water scarcity
Jing-Jin-Ji (China)	1997 drought event	2001	Summer	Socioeconomic	Energy	electricity (shortage)
Jing-Jin-Ji (China)	1997 drought event	2001	Autumn	Hydrological	Lake & Reservoir	decreased water stock
Jing-Jin-Ji (China)	1997 drought event	2001	Autumn	Hydrological	Groundwater	dropped water level
Jing-Jin-Ji (China)	1997 drought event	2001/2002	Winter	Meteorological	Precipitation	deficit
Jing-Jin-Ji (China)	1997 drought event	2001/2002	Winter	Ecological	Vegetation	abnormal phenological period (advanced growth of the winter wheat)
Jing-Jin-Ji (China)	1997 drought event	2001/2002	Winter	Agricultural	Soil moisture	insufficient moisture
Jing-Jin-Ji (China)	1997 drought event	2001/2002	Winter	Agricultural	Crop	growth affected
Jing-Jin-Ji (China)	1997 drought event	2002	Spring	Meteorological	Precipitation	deficit
Jing-Jin-Ji (China)	1997 drought event	2002	Spring	Ecological	Soil	dust storm
Jing-Jin-Ji (China)	1997 drought event	2002	Spring	Agricultural	Soil moisture	cracks in land
Jing-Jin-Ji (China)	1997 drought event	2002	Spring	Agricultural	Crop	growth affected, harvest failure (in the mountainous area)
Jing-Jin-Ji (China)	1997 drought event	2002	Spring	Hydrological	River	reduced flow
Jing-Jin-Ji (China)	1997 drought event	2002	Spring	Hydrological	Lake & Reservoir	dry up
Jing-Jin-Ji (China)	1997 drought event	2002	Spring	Hydrological	Groundwater	wells dry up
Jing-Jin-Ji (China)	1997 drought event	2002	Spring	Socioeconomic	Water security	drinking water (difficult supply in rural areas), other usage (urban water scarcity due to imbalance between supply and demand)
Jing-Jin-Ji (China)	1997 drought event	2002	Spring	Socioeconomic	Economy	decreased income (rural households, reduced capacity of self-help)
Jing-Jin-Ji (China)	1997 drought event	2002	Summer	Meteorological	Precipitation	severe deficit
Jing-Jin-Ji (China)	1997 drought event	2002	Summer	Meteorological	Temperature	heatwave
Jing-Jin-Ji (China)	1997 drought event	2002	Summer	Ecological	Vegetation	anormal phenological period (early harvest of wheat), insect plague (locust)
Jing-Jin-Ji (China)	1997 drought event	2002	Summer	Agricultural	Soil moisture	insufficient moisture
Jing-Jin-Ji (China)	1997 drought event	2002	Summer	Agricultural	Crop	growth affected
Jing-Jin-Ji (China)	1997 drought event	2002	Summer	Hydrological	River	reduced flow
Jing-Jin-Ji (China)	1997 drought event	2002	Summer	Hydrological	Lake & Reservoir	decreased water stock, dry up (water cellars in villages)
Jing-Jin-Ji (China)	1997 drought event	2002	Summer	Hydrological	Groundwater	dropped water level
Jing-Jin-Ji (China)	1997 drought event	2002	Summer	Socioeconomic	Water security	drinking water (difficult supply in rural areas), other usage (urban water scarcity due to imbalance between supply and demand)
Jing-Jin-Ji (China)	1997 drought event	2002	Summer	Socioeconomic	Energy	electricity (shortage in urban areas)
Jing-Jin-Ji (China)	1997 drought event	2002	Summer	Socioeconomic	Economy	decreased income (rural households, economic difficulties in agricultural production and daily life)
Jing-Jin-Ji (China)	1997 drought event	2002	Autumn	Meteorological	Precipitation	deficit
Jing-Jin-Ji (China)	1997 drought event	2002	Autumn	Ecological	Vegetation	insect plague (locust)
Jing-Jin-Ji (China)	1997 drought event	2002	Autumn	Agricultural	Soil moisture	insufficient moisture
Jing-Jin-Ji (China)	1997 drought event	2002	Autumn	Agricultural	Crop	difficulty in sowing, harvest failure
Jing-Jin-Ji (China)	1997 drought event	2002	Autumn	Hydrological	River	reduced flow
Jing-Jin-Ji (China)	1997 drought event	2002	Autumn	Hydrological	Lake & Reservoir	decreased water stock
Jing-Jin-Ji (China)	1997 drought event	2002	Autumn	Hydrological	Groundwater	dropped water level
Jing-Jin-Ji (China)	1997 drought event	2002	Autumn	Socioeconomic	Water security	drinking water (difficult supply in rural areas), other usage (urban water scarcity due to imbalance between supply and demand)
